# Supplementary material for: Blood immunophenotyping identifies distinct kidney histopathology and outcomes in patients with lupus nephritis
Source: JCI journal article supplement (doi:10.1172/jci181034), 2025-06-19
Supplement: sd1 [file 1]

**Supplemental Table 1.** Baseline characteristics of all subjects included in the study and renal response to treatment at 52 weeks

|                                                          | <b>Lupus nephritis patients</b> | <b>Controls</b> | <b><i>p value</i><sup>*</sup></b> |
|----------------------------------------------------------|---------------------------------|-----------------|-----------------------------------|
| <b>N</b>                                                 | <b>145</b>                      | <b>40</b>       |                                   |
| <b>Age, median (IQR)</b>                                 | 33 (26-43)                      | 44 (27-60)      | 0.02                              |
| <b>Female</b>                                            | 126 (87)                        | 28 (70)         | 0.02                              |
| <b>Ethnicity and Race<sup>1</sup></b>                    |                                 |                 |                                   |
| Hispanic or Latino                                       | 45 (31)                         | 4/39 (10)       | 0.008                             |
| Black                                                    | 67/128 (52)                     | 10 (25)         | 0.003                             |
| <b>Age at first biopsy<sup>2</sup></b>                   | 26 (19-33)                      |                 |                                   |
| <b>Previous renal biopsy</b>                             | 100 (69)                        |                 |                                   |
| Previous LN class I or II                                | 12 (8)                          |                 |                                   |
| Previous LN class III, IV and/or V                       | 88 (61)                         |                 |                                   |
| <b>Current renal histologic ISN class</b>                |                                 |                 |                                   |
| Proliferative (III or IV +/- V)                          | 102 (70)                        |                 |                                   |
| Membranous (V)                                           | 43 (30)                         |                 |                                   |
| <b>Activity index<sup>32</sup>, median (IQR)</b>         | 4 (1-7)                         |                 |                                   |
| <b>Chronicity index<sup>32</sup>, median (IQR)</b>       | 3 (2-5)                         |                 |                                   |
| <b>Serum creatinine<sup>43</sup> mg/ml, median (IQR)</b> | 0.9 (0.7-1.2)                   |                 |                                   |
| <b>UPCR, median (IQR)</b>                                | 2.0 (1.2-3.8)                   |                 |                                   |
| <b>Presence of cSLEDAI extrarenal<sup>54</sup></b>       | 65/130 (50)                     |                 |                                   |
| <b>Positive anti-dsDNA</b>                               | 96/142 (68)                     |                 |                                   |
| <b>Low C3 and/or low C4</b>                              | 97/143 (68)                     |                 |                                   |
| <b>Medication at baseline</b>                            |                                 |                 |                                   |
| Hydroxychloroquine                                       | 121/144 (84)                    |                 |                                   |
| Prednisone dose, med (IQR) <sup>65</sup>                 | 5 (0-25)                        |                 |                                   |
| Any immunosuppressants <sup>76</sup>                     | 104/144 (75)                    |                 |                                   |
| Mycophenolate                                            | 82/144 (57)                     |                 |                                   |
| Cyclophosphamide                                         | 2/144 (1)                       |                 |                                   |
| <b>Renal response at 52 weeks (n=112)<sup>87</sup></b>   |                                 |                 |                                   |
| CR, PR, NR                                               | 31 (28), 27 (24), 54 (48)       |                 |                                   |

UPCR = urine protein/creatinine ratio. CR, PR, NR = complete, partial and non-responder. Data is presented as N (%) unless specified otherwise. The proportions, median and IQR are calculated on the total number of subjects in the group unless specified otherwise. \*Chi-square, Fisher exact or Mann-Whitney tests were used when appropriate for comparison between patients and controls. <sup>1</sup>Self-reported; subjects with mixed ethnicity and race were counted twice. <sup>2</sup>n=97. <sup>3</sup>NIH activity and chronicity indices available in n=124. <sup>4</sup>n=139. <sup>5</sup>Presence of any clinical extrarenal features of the SLE Disease Activity Index (SLEDAI). <sup>6</sup>Prednisone dose or equivalence at baseline in n=133, excluding one patient with missing data and seven patients receiving intravenous methylprednisolone ('pulse') dose ranging from 500-1000mg. <sup>7</sup>Includes immunosuppressants and biologics (azathioprine, tacrolimus, cyclosporin, methotrexate, abatacept or belimumab). <sup>8</sup>Renal response was determined at week 52 if baseline UPCR was  $\geq 1$ .

**Supplemental Table 2.** Number of samples analyzed with the different panels after filtering for quality control

| Panels                                 | Lupus nephritis patients<br>(Total n = 227) |     |     |     |          | Controls<br>(Total n = 40) |    |    |    |          |
|----------------------------------------|---------------------------------------------|-----|-----|-----|----------|----------------------------|----|----|----|----------|
|                                        | B                                           | T   | M   | NK  | 4 panels | B                          | T  | M  | NK | 4 panels |
| <b>Samples</b>                         | 224                                         | 213 | 203 | 191 | 185      | 40                         | 40 | 40 | 39 | 39       |
| <b>Subjects</b>                        | 145                                         | 139 | 134 | 125 | 124      | 40                         | 40 | 40 | 39 | 39       |
| <b>Subjects with baseline visit</b>    | 140                                         | 131 | 125 | 116 | 115      | 40                         | 40 | 40 | 39 | 39       |
| <b>Subjects with follow-up visits*</b> | 49                                          | 46  | 45  | 43  | 42       | 0                          | 0  | 0  | 0  | 0        |
| at least bas. and week-12              | 42                                          | 38  | 35  | 35  | 33       | 0                          | 0  | 0  | 0  | 0        |
| at least week-12 and -52               | 34                                          | 33  | 32  | 30  | 27       | 0                          | 0  | 0  | 0  | 0        |
| at least bas. and week-52              | 33                                          | 31  | 27  | 26  | 23       | 0                          | 0  | 0  | 0  | 0        |
| at least bas, week-12 and -52          | 30                                          | 28  | 25  | 24  | 21       | 0                          | 0  | 0  | 0  | 0        |

Samples were stained with panels designed to characterize B cells (B panel), T cells (T panel), myeloid cells (M panel) and NK cells (NK panel). All values represent the number of samples or subjects who had cells stained with each panel or with all 4 panels. If the cell counts in samples were low after thawing, the panels were prioritized as following: B panel first, T panel, M panel and NK panel last. \*Include any subjects with any 2 visits (bas. = baseline).

**Supplemental Table 3.** Baseline characteristics and renal response at week 52 of LN patients stratified by immunophenotype subgroups (n=115 LN with samples analyzed with 4 panels)

|                                                   | LN-G0<br>“control-like”<br>23 | LN-G1<br>“IFN-I high”<br>46 | LN-G2<br>“cytotoxic T”<br>46 | global<br>p val. * | G1-G2<br>p val. <sup>£</sup> |
|---------------------------------------------------|-------------------------------|-----------------------------|------------------------------|--------------------|------------------------------|
| <b>N</b>                                          |                               |                             |                              |                    |                              |
| <b>Age, median (IQR)</b>                          | 41 (31-46)                    | 30 (24-39)                  | 33 (26-44)                   | 0.007              | 0.06                         |
| <b>Female</b>                                     | 19 (83)                       | 37 (80)                     | 42 (91)                      | 0.31               |                              |
| <b>Ethnicity and race</b>                         |                               |                             |                              |                    |                              |
| <b>Hispanic or Latino</b>                         | 11 (48)                       | 7 (15)                      | 19 (41)                      | 0.006              | 0.01                         |
| <b>Black</b>                                      | 10/19 (53)                    | 20/43 (47)                  | 23/41 (56)                   | 0.70               |                              |
| <b>Age at first biopsy</b>                        | 31 (24-38)                    | 21 (18-29)                  | 25 (20-34)                   | 0.02               | 0.25                         |
| <b>Previous renal biopsy</b>                      | 20 (87)                       | 34 (74)                     | 29 (63)                      | 0.10               |                              |
| <b>Proliferative class (III or IV +/- V)</b>      | 9 (39)                        | 31 (67)                     | 39 (85)                      | <0.001             | 0.09                         |
| <b>Activity index<sup>1</sup>, median (IQR)</b>   | 1 (0-1)                       | 4 (0-6)                     | 5 (3-8)                      | <0.001             | 0.03                         |
| <b>Chronicity index<sup>1</sup>, median (IQR)</b> | 6 (3-7)                       | 3 (1-4)                     | 3 (2-4)                      | 0.005              | 0.26                         |
| <b>Serum creatinine mg/ml, median (IQR)</b>       | 1.0 (0.8-1.5)                 | 0.8 (0.7-1.0)               | 1.0 (0.8-1.3)                | 0.04               | 0.04                         |
| <b>UPCR, median (IQR)</b>                         | 3.4 (1.6-4.8)                 | 1.4 (1.0-2.7)               | 2.2 (1.5-4.3)                | 0.02               | 0.009                        |
| <b>Presence of cSLEDAI extrarenal<sup>2</sup></b> | 5 (26)                        | 16 (37)                     | 23 (50)                      | 0.05               |                              |
| <b>Positive anti-dsDNA</b>                        | 5 (22)                        | 38/45 (84)                  | 36 (78)                      | <0.001             | 0.63                         |
| <b>Low C3 and/or low C4</b>                       | 5 (22)                        | 31/45 (69)                  | 34 (74)                      | <0.001             | 0.62                         |
| <b>Medication</b>                                 |                               |                             |                              |                    |                              |
| <b>Hydroxychloroquine</b>                         | 19 (86)                       | 42 (91)                     | 34 (74)                      | 0.08               |                              |
| <b>Prednisone, med (IQR)<sup>3</sup></b>          | 0 (0-10)                      | 0 (0-7)                     | 20 (5-40)                    | <0.001             | <0.001                       |
| <b>Any immunosuppressants<sup>4</sup></b>         | 17 (77)                       | 39 (85)                     | 30 (65)                      | 0.08               |                              |
| <b>Mycophenolate</b>                              | 13 (59)                       | 32 (70)                     | 23 (50)                      | 0.25               |                              |
| <b>Renal response at week 52<sup>5</sup></b>      |                               |                             |                              |                    |                              |
| <b>CR, PR, NR</b>                                 | 3(18), 3(18), 11(65)          | 6(18), 9(27), 19(56)        | 15(41), 9(24), 13(35)        | 0.04               | 0.03                         |

UPCR = urine protein/creatinine ratio. CR, PR, NR = complete, partial and non-responder. Data is presented as N (%) unless specified otherwise. The proportions, median and IQR are calculated on the total number of subject in the group unless specified otherwise. \*Chi-square, Fisher exact or Kruskal-Wallis tests when appropriate to test for differences across the three groups. <sup>£</sup>Chi-square, Fisher exact or Wilcoxon rank sum test to test for differences between G1 and G2. <sup>1</sup>NIH activity and chronicity indices available in n=100. <sup>2</sup>Presence of any clinical extrarenal features of the SLE Disease Activity Index (SLEDAI). <sup>3</sup>Prednisone dose or equivalence at baseline in n=110, excluding five patients receiving intravenous methylprednisolone ('pulse') dose ranging from 500-1000mg. <sup>4</sup>Includes any immunosuppressants and biologics (azathioprine, tacrolimus, cyclosporine, methotrexate, abatacept or belimumab). <sup>5</sup>Renal response was determined at week 52 if baseline UPCR was  $\geq 1$  (n=88).

**Supplemental Table 4.** Baseline antibody profiles in patients with LN stratified by immunophenotype subgroups and available autoantibody profiles previously published<sup>1</sup>

|                                         | LN-G0<br>“control-like”<br><b>N</b><br><b>23</b> | LN-G1<br>“IFN-I high”<br><b>43</b> | LN-G2<br>“cytotoxic T”<br><b>45</b> | <i>global</i><br><i>p val. *</i> | <i>G1-G2</i><br><i>p val. <sup>£</sup></i> |
|-----------------------------------------|--------------------------------------------------|------------------------------------|-------------------------------------|----------------------------------|--------------------------------------------|
| <b>Anti-dsDNA, median (IQR)</b>         | 3 (1-7)                                          | 22 (7-84)                          | 35 (11-126)                         | <0.001                           | 0.18                                       |
| <b>Anti-chromatine, N (%) positive</b>  | 7 (30)                                           | 36 (84)                            | 43 (96)                             | <0.001                           | 0.09                                       |
| <b>Anti-ribosomal P, N (%) positive</b> | 1 (4)                                            | 13 (30)                            | 15 (33)                             | 0.017                            | 0.82                                       |
| <b>Anti-SSA 52kd, N (%) positive</b>    | 2 (9)                                            | 11 (26)                            | 8 (18)                              | 0.27                             |                                            |
| <b>Anti-SSA 60kd, N (%) positive</b>    | 7 (30)                                           | 19 (44)                            | 23 (51)                             | 0.26                             |                                            |
| <b>Anti-SSB, N (%) positive</b>         | 0                                                | 7 (16)                             | 4 (9)                               | 0.12                             |                                            |
| <b>Anti-Sm, N (%) positive</b>          | 5 (22)                                           | 26 (60)                            | 25 (56)                             | 0.007                            | 0.67                                       |
| <b>Anti-SmRNP, N (%) positive</b>       | 11 (48)                                          | 30 (70)                            | 28 (62)                             | 0.21                             |                                            |
| <b>Anti-RNP, N (%) positive</b>         | 6 (26)                                           | 21 (49)                            | 28 (62)                             | 0.018                            | 0.28                                       |

Serum samples from the AMP phase II were screened for auto-antibodies using the BioPlex 2200 ANA kit (Bio-Rad Technologies) as previously published in : Fava, A. et al. Association of autoantibody concentrations and trajectories with lupus nephritis histological features and treatment response. Arthritis Rheumatol (2024) doi:10.1002/art.42941.

\*Chi-square, Fisher exact or Kruskal-Wallis tests when appropriate to test for differences across the three groups.

<sup>£</sup>Chi-square, Fisher exact or Wilcoxon rank sum test to test for differences between G1 and G2.



**Supplemental Table 5.** Blood-defined group membership and treatment received at the time of blood sampling in patients with lupus nephritis who had samples at three timepoints and samples stained with all panels.

| Baseline visit |                    | Week 12 |                       | Week 52 |                        |
|----------------|--------------------|---------|-----------------------|---------|------------------------|
| group          | treatments         | group   | treatments            | group   | treatments             |
| G2             | HCQ,Pred60,MMF2000 | G2      | HCQ,Pred2.5,MMF2000   | G2      | HCQ,Pred60             |
| G2             | HCQ,Pred20,MMF3000 | G2      | HCQ,Pred15,MMF3000    | G2      | HCQ,Pred10,MMF3000,RTX |
| G2             | HCQ,Pred60,MMF1000 | G2      | HCQ,Pred5,MMF3000     | G2      | HCQ,Pred2.5,MMF3000    |
| G2             | HCQ,Pred40,MMF1000 | G1      | HCQ,Pred10,AZA        | G1      | HCQ,Pred7.5,AZA        |
| G2             | HCQ,Pred60         | G0      | HCQ,Pred30,MMF1500    | G1      | HCQ,Pred8,MMF1500      |
| G2             | HCQ,Pred25         | G1      | HCQ,Pred5,MMF2000     | G1      | HCQ,Pred5,MMF2000      |
| G2             | HCQ,Pred4          | G1      | HCQ,Pred1250,MMF3000  | G1      | HCQ,MMF3000            |
| G2             | Pred5              | G1      | MMF3000               | G0      | MMF2000                |
| G2             | HCQ,Pred5          | G2      | HCQ,Pred40,MMF3000    | G0      | HCQ,MMF3000            |
| G1             | HCQ,Pred15,AZA     | G2      | HCQ,Pred10,CYC,RTX    | G2      | HCQ,Dapsone,Pred15     |
| G1             | HCQ,Pred5,MMF2500  | G1      | HCQ,Pred5,MMF3000,TAC | G2      | Pred2.5,MMF3000,TAC    |
| G1             | HCQ,MMF1000        | G1      | HCQ,MMF2000           | G1      | HCQ,MMF3000            |
| G1             | HCQ,MMF2000        | G1      | HCQ,MMF2000           | G1      | HCQ,MMF3000            |
| G1             | HCQ,MMF1000        | G2      | HCQ,Pred20,CYC        | G0      | HCQ,Pred5,AZA          |
| G0             | HCQ,Pred20,MMF2000 | G0      | HCQ,Pred20,MMF2000    | G0      | HCQ,MMF2000            |
| G0             | HCQ, MMF3000       | G0      | HCQ, MMF3000          | G0      | HCQ, MMF3000           |
| G0             | not recorded       | G0      | HCQ,Pred10            | G0      | HCQ,Pred5,MMF2000      |
| G0             | HCQ,Pred5,AZA      | G0      | HCQ,Pred5,AZA         | G0      | HCQ,Pred2.5,AZA        |
| G0             | HCQ,MMF2000        | G0      | HCQ,MMF2000           | G0      | HCQ,MMF3000            |
| G0             | HCQ,MMF3000        | G0      | not recorded          | G0      | not recorded           |
| G0             | HCQ,Pred40         | G0      | HCQ,Pred5,MMF3000     | G0      | HCQ,Pred5,MMF2000,TAC  |

HCQ = hydroxychloroquine, Pred = prednisone dose or equivalent, MMF = mycophenolate mofetil, CYC = cyclophosphamide, AZA = azathioprine, TAC = tacrolimus, RTX = rituximab. Prednisone and MMF dose are specified in the table.

**Supplemental Table 6.** Lineage and B-cell specific mass cytometry antibodies

| Panel | Metal | Marker  | Clone     | Supplier                   | Catalog #      |
|-------|-------|---------|-----------|----------------------------|----------------|
| All   | 89Y   | CD45    | HI30      | Biolegend                  | 304045         |
| All   | 111Cd | CD172ab | SE5A5     | Biolegend                  | 323802         |
| All   | 112Cd | CD8a    | RPA T8    | Biolegend                  | 301053         |
| All   | 113Cd | CD20    | 2H7       | Biolegend                  | 302343         |
| All   | 114Cd | CD4     | RPA T4    | Biolegend                  | 300541         |
| All   | 115In | CD3     | UCHT1     | Biolegend                  | 300402         |
| All   | 116Cd | CD56    | NCAM16.2  | BD Biosciences             | 559043         |
| B     | 141Pr | CD27    | O323      | Biolegend                  | 302802         |
| B     | 142Nd | Bcl-6   | IG191E/A8 | Biolegend                  | 648302         |
| B     | 143Nd | SLAMF7  | 235614    | R&D Systems                | MAB1906        |
| B     | 144Nd | CD24    | ML5       | Biolegend                  | 311102         |
| B     | 145Nd | CD19    | HIB19     | Biolegend                  | 302247         |
| B     | 146Nd | AICDA   | EK2-5G9   | R&D Systems                | MAB39102       |
| B     | 147Sm | CD86    | IT2.2     | Biolegend                  | 305410         |
| B     | 148Nd | CD1c    | L161      | Biolegend                  | 331502         |
| B     | 149Sm | CD22    | HIB22     | Biolegend                  | 302502         |
| B     | 150Nd | CD11c   | Bu15      | Biolegend                  | 337221         |
| B     | 151Eu | CD5     | UCHT2     | Biolegend                  | 300602         |
| B     | 152Sm | Bcl-2   | 100       | Biolegend                  | 658702         |
| B     | 153Eu | IgD     | IA6-2     | Biolegend                  | 348202         |
| B     | 154Sm | CXCR5   | J252D4    | Biolegend                  | 356902         |
| B     | 155Gd | CD23    | EBVCS-5   | Biolegend                  | custom         |
| B     | 156Gd | CD95    | DX2       | Biolegend                  | 305602         |
| B     | 157Gd | CD25    | M-A251    | Biolegend                  | 356102         |
| B     | 158Gd | CD39    | A1        | Biolegend                  | 328202         |
| B     | 159Tb | TLR9    | S16013D   | Biolegend                  | 394802         |
| B     | 160Gd | CD307d  | 413D12    | Biolegend                  | 340202         |
| B     | 161Dy | CD138   | REA929    | Miltenyi Biotech           | Custom (200ug) |
| B     | 162Dy | Nur77   | H1648     | R&D Systems                | PP-H1648-00    |
| B     | 163Dy | CD83    | HB15e     | Biolegend                  | 305302         |
| B     | 164Dy | CD79b   | CB3-1     | eBioscience                | 14-0793-82     |
| B     | 165Ho | CD38    | HIT2      | Biolegend                  | 303535         |
| B     | 166Er | CD40    | 5C3       | Biolegend                  | 334304         |
| B     | 167Er | CD10    | HI10a     | Biolegend                  | 312223         |
| B     | 168Er | IgA     | IS11-8E10 | Miltenyi Biotech           | 130-122-335    |
| B     | 169Tm | Pax-5   | 1H9       | Biolegend                  | 649702         |
| B     | 170Er | PD-L1   | 29E.2A3   | Biolegend                  | 329702         |
| B     | 171Yb | IgG     | G18-145   | BD Biosciences             | 555784         |
| B     | 172Yb | ISG15   | 539442    | R&D Systems                | MAB4845        |
| B     | 173Yb | CD21    | Bu32      | Biolegend                  | 354902         |
| B     | 174Yb | Ki67    | 8D5       | Cell Signalling Technology | 9449BF         |
| B     | 175Lu | T-bet   | 4B10      | Biolegend                  | 644802         |
| B     | 176Yb | IgM     | MHM-88    | Biolegend                  | 314502         |
| B     | 194Pt | Blimp1  | 646702    | R&D Systems                | MAB36081       |
| B     | 195Pt | HLA-DR  | L243      | Biolegend                  | 307651         |
| B     | 196Pt | CD52    | HI186     | Biolegend                  | 316002         |
| B     | 198Pt | IgE     | MHE-18    | Biolegend                  | 325502         |
| B     | 209Bi | CD11b   | ICRF44    | Standard Biotools          | 3209003B       |

Cells highlighted in grey are common to all panels.

**Supplemental Table 7.** T-cell specific mass cytometry antibodies

| Panel | Metal | Marker  | Clone    | Supplier                   | Catalog #      |
|-------|-------|---------|----------|----------------------------|----------------|
| T     | 141Pr | CCR6    | G034E3   | Biolegend                  | 353402         |
| T     | 142Nd | CD45RA  | REA562   | Miltenyi Biotech           | 130-122-292    |
| T     | 143Nd | MX1     | D3W7I    | Cell Signalling Technology | 37849BF        |
| T     | 144Nd | CCR4    | L291H4   | Biolegend                  | 359402         |
| T     | 145Nd | PU.1    | phpu13   | eBioscience                | 14-9819-82     |
| T     | 146Nd | SH2D1A  | 1A9      | Biolegend                  | 690702         |
| T     | 147Sm | CD45RO  | REA611   | Miltenyi Biotech           | 130-124-323    |
| T     | 148Nd | CXCR3   | REA232   | Miltenyi Biotech           | 130-108-022    |
| T     | 149Sm | GZMK    | GM26E7   | Biolegend                  | 370502         |
| T     | 150Nd | TACTILE | 628211   | R&D Systems                | MAB6199        |
| T     | 151Eu | PD-1    | EH12.2H7 | Biolegend                  | 329912         |
| T     | 152Sm | CTLA-4  | L3D10    | Biolegend                  | 349931         |
| T     | 153Eu | CD69    | FN50     | Biolegend                  | 310939         |
| T     | 154Sm | CXCR5   | J252D4   | Biolegend                  | 356902         |
| T     | 155Gd | CD15s   | FH6      | Biolegend                  | 368102         |
| T     | 156Gd | CD8b    | SID18BEE | eBioscience                | 14-5273-82     |
| T     | 157Gd | CD25    | M-A251   | Biolegend                  | 356102         |
| T     | 158Gd | CD39    | A1       | Biolegend                  | 328202         |
| T     | 159Tb | TCF1    | 7F11A10  | Biolegend                  | 655202         |
| T     | 160Gd | ICOS    | C398.4A  | Biolegend                  | 313502         |
| T     | 161Dy | AHR     | FF3399   | eBioscience                | 14-9854-82     |
| T     | 162Dy | Nur77   | H1648    | R&D Systems                | PP-H1648-00    |
| T     | 163Dy | CCR2    | K036C2   | Biolegend                  | 357202         |
| T     | 164Dy | CD161   | HP-3G10  | Biolegend                  | 339919         |
| T     | 165Ho | FoxP3   | REA1253  | Miltenyi Biotech           | Custom (300ug) |
| T     | 166Er | CD40L   | 24-31    | Biolegend                  | 310812         |
| T     | 167Er | GZMB    | GB11     | Biolegend                  | custom         |
| T     | 168Er | Helios  | REA829   | Miltenyi Biotech           | 130-124-521    |
| T     | 169Tm | CX3CR1  | REA385   | Miltenyi Biotech           | 130-122-286    |
| T     | 170Er | RORyt   | REA278   | Miltenyi Biotech           | 130-108-059    |
| T     | 171Yb | CD127   | eBioRDR5 | eBioscience                | 14-1278-82     |
| T     | 172Yb | GATA3   | REA174   | Miltenyi Biotech           | 130-108-061    |
| T     | 173Yb | TIGIT   | MBSA43   | eBioscience                | 16-9500        |
| T     | 174Yb | Ki67    | 8D5      | Cell Signalling Technology | 9449BF         |
| T     | 175Lu | T-bet   | 4B10     | Biolegend                  | 644802         |
| T     | 176Yb | CCR7    | REA546   | Miltenyi Biotech           | 130-122-300    |
| T     | 194Pt | CD57    | REA769   | Miltenyi Biotech           | 130-124-525    |
| T     | 195Pt | HLA-DR  | L243     | Biolegend                  | 307651         |
| T     | 196Pt | CD103   | Ber-ACT8 | Biolegend                  | 350202         |
| T     | 198Pt | CD38    | HIT2     | Biolegend                  | 303535         |
| T     | 209Bi | CD11b   | ICRF44   | Standard Bitools           | 3209003B       |

Cells highlighted in grey are common to all panels.

**Supplemental Table 8.** Myeloid-cell specific mass cytometry antibodies

| Panel   | Metal | Marker   | Clone      | Supplier                   | Catalog #   |
|---------|-------|----------|------------|----------------------------|-------------|
| Myeloid | 141Pr | Siglec-6 | 767329     | R&D Systems                | MAB2859     |
| Myeloid | 142Nd | TLR4     | 610015     | R&D Systems                | MAB6248     |
| Myeloid | 143Nd | CD36     | 5-271      | Biolegend                  | 336202      |
| Myeloid | 144Nd | CD64     | 10.1       | Biolegend                  | 305016      |
| Myeloid | 145Nd | CD163    | REA812     | Miltenyi Biotech           | 130-122-293 |
| Myeloid | 146Nd | CD74     | LN2        | Biolegend                  | 326802      |
| Myeloid | 147Sm | CD86     | IT2.2      | Biolegend                  | 305410      |
| Myeloid | 148Nd | CD1c     | L161       | Biolegend                  | 331502      |
| Myeloid | 149Sm | CD1d     | 51.1       | Biolegend                  | 350321      |
| Myeloid | 150Nd | CD11c    | Bu15       | Biolegend                  | 337221      |
| Myeloid | 151Eu | CD123    | 6H6        | Biolegend                  | 306027      |
| Myeloid | 152Sm | CD14     | M5E2       | Biolegend                  | 301843      |
| Myeloid | 153Eu | CD85d    | 42D1       | Biolegend                  | 338713      |
| Myeloid | 154Sm | CD15     | MC-480     | Biolegend                  | 125602      |
| Myeloid | 155Gd | Siglec-1 | 7-239      | Biolegend                  | 346002      |
| Myeloid | 156Gd | XCR1     | 1097A      | R&D Systems                | MAB8571     |
| Myeloid | 157Gd | CD16     | 3G8        | Biolegend                  | 302051      |
| Myeloid | 158Gd | CD39     | A1         | Biolegend                  | 328202      |
| Myeloid | 159Tb | TLR9     | S16013D    | Biolegend                  | 394802      |
| Myeloid | 160Gd | FPR1     | 350418     | R&D Systems                | MAB3744     |
| Myeloid | 161Dy | CD303    | REA693     | Miltenyi Biotech           | 130-124-317 |
| Myeloid | 162Dy | MARCO    | Polyclonal | R&D Systems                | AF7586      |
| Myeloid | 163Dy | CCR2     | K036C2     | Biolegend                  | 357202      |
| Myeloid | 164Dy | CD141    | M80        | Biolegend                  | 344102      |
| Myeloid | 165Ho | CD38     | HIT2       | Biolegend                  | 303535      |
| Myeloid | 166Er | CLEC9A   | REA976     | Miltenyi Biotech           | 130-122-306 |
| Myeloid | 167Er | CD84     | CD84.1.21  | Biolegend                  | 326002      |
| Myeloid | 168Er | HO-1     | HO-1-1     | ThermoFisher               | MA1-112     |
| Myeloid | 169Tm | CX3CR1   | REA385     | Miltenyi Biotech           | 130-122-286 |
| Myeloid | 170Er | PD-L1    | 29E.2A3    | Biolegend                  | 329702      |
| Myeloid | 171Yb | CD206    | 19.2       | BD Biosciences             | 555953      |
| Myeloid | 172Yb | IRF8     | REA516     | Miltenyi Biotech           | custom      |
| Myeloid | 173Yb | CD170    | 1A5        | Biolegend                  | 352002      |
| Myeloid | 174Yb | Ki67     | 8D5        | Cell Signalling Technology | 9449BF      |
| Myeloid | 175Lu | CD85i    | 586326     | R&D Systems                | MAB30851    |
| Myeloid | 176Yb | CD68     | Y1/82A     | Biolegend                  | 333802      |
| Myeloid | 194Pt | CD180    | MHR73-11   | Biolegend                  | 312906      |
| Myeloid | 195Pt | HLA-DR   | L243       | Biolegend                  | 307651      |
| Myeloid | 196Pt | FOLR2    | 94b/FOLR2  | Biolegend                  | 391702      |
| Myeloid | 198Pt | CD115    | 61708      | R&D Systems                | MAB329      |
| Myeloid | 209Bi | CD11b    | ICRF44     | Standard Biotools          | 3209003B    |

Cells highlighted in grey are common to all panels.

**Supplemental Table 9.** NK-cell specific mass cytometry antibodies

| Panel | Metal | Marker   | Clone       | Supplier                   | Catalog #   |
|-------|-------|----------|-------------|----------------------------|-------------|
| NK    | 141Pr | GNLY     | Polyclonal  | R&D Systems                | AF3138      |
| NK    | 142Nd | KIR2DS1  | 1127B       | R&D Systems                | MAB8887     |
| NK    | 143Nd | CD2      | TS1/8       | Biolegend                  | 309202      |
| NK    | 144Nd | DAP12    | 406288      | R&D Systems                | MAB5240     |
| NK    | 145Nd | NKG2C    | REA205      | Miltenyi Biotech           | 130-122-278 |
| NK    | 146Nd | SH2D1A   | 1A9         | Biolegend                  | 690702      |
| NK    | 147Sm | CD7      | 6B7         | Biolegend                  | 343102      |
| NK    | 148Nd | GZMA     | CB9         | Biolegend                  | 507202      |
| NK    | 149Sm | GZMK     | GM26E7      | Biolegend                  | 370502      |
| NK    | 150Nd | 2B4      | C1.7        | Biolegend                  | 329502      |
| NK    | 151Eu | TCRVd1   | REA173      | Miltenyi Biotech           | 120-014-229 |
| NK    | 152Sm | PSGL-1   | CHO131      | R&D Systems                | MAB996      |
| NK    | 153Eu | CD69     | FN50        | Biolegend                  | 310939      |
| NK    | 154Sm | TCRgd    | REA591      | Miltenyi Biotech           | 130-122-291 |
| NK    | 155Gd | EOMES    | WD1928      | eBioscience                | 14-4877-82  |
| NK    | 156Gd | CD8b     | SID18BEE    | eBioscience                | 14-5273-82  |
| NK    | 157Gd | CD16     | 3G8         | Biolegend                  | 302051      |
| NK    | 158Gd | CD39     | A1          | Biolegend                  | 328202      |
| NK    | 159Tb | PLZF     | R17-809     | BD Biosciences             | Custom      |
| NK    | 160Gd | NKp30    | P30-15      | Biolegend                  | 325202      |
| NK    | 161Dy | MR-1-tet | 5-OP-RU     | Biolegend                  | Custom      |
| NK    | 162Dy | NKp80    | 5D12        | Biolegend                  | 346703      |
| NK    | 163Dy | 4-1BB    | REA765      | Miltenyi Biotech           | 130-124-527 |
| NK    | 164Dy | CXCR6    | K041E5      | Biolegend                  | 356002      |
| NK    | 165Ho | KIR2DS2  | Polyclonal  | ThermoFisher               | PA5-31465   |
| NK    | 166Er | CD107a   | H4A3        | Biolegend                  | 328602      |
| NK    | 167Er | GZMB     | GB11        | Biolegend                  | custom      |
| NK    | 168Er | NKp46    | REA808      | Miltenyi Biotech           | 130-124-522 |
| NK    | 169Tm | CD3z     | 6B10.2      | Biolegend                  | 644102      |
| NK    | 170Er | iNKT     | 6B11        | Miltenyi Biotech           | 130-094-865 |
| NK    | 171Yb | TCRVd2   | REA771      | Miltenyi Biotech           | 130-095-212 |
| NK    | 172Yb | NKG2D    | 149810      | R&D Systems                | MAB139      |
| NK    | 173Yb | TCRab    | T10B9.1A-31 | BD Biosciences             | 555546      |
| NK    | 174Yb | Ki67     | 8D5         | Cell Signalling Technology | 9449BF      |
| NK    | 175Lu | Tbet     | 4B10        | Biolegend                  | 644802      |
| NK    | 176Yb | Perforin | dG9         | Biolegend                  | 308102      |
| NK    | 194Pt | CD57     | REA769      | Miltenyi Biotech           | 130-124-525 |
| NK    | 195Pt | HLA-DR   | L243        | Biolegend                  | 307651      |
| NK    | 196Pt | SLAMF6   | 292811      | R&D Systems                | MAB19081    |
| NK    | 198Pt | CD38     | HIT2        | Biolegend                  | 303535      |
| NK    | 209Bi | CD11b    | ICRF44      | Standard Biotoools         | 3209003B    |

Cells highlighted in grey are common to all panels.

## **AMP RA/SLE Network**

### **Operation/Scientific**

Operations – William Apruzzese, Jennifer Goff, Patrick J. Dunn

SBG – Soumya Raychaudhuri, Fan Zhang, Ilya Korsunsky, Aparna Nathan, Joseph Mears, Kazuyoshi Ishigaki, Qian Xiao, Nghia Millard, Kathryn Weinand, Saori Sakaue

LC/STAMP – PJ Utz, Rong Mao, Bill Robinson, Holden Maecker

OMRF – Judith James, Joel Guthridge, Wade DeJager, Susan Macwana

### **SLE**

Rochester – Jennifer Anolik, Jennifer Barnas

BWH – Michael B. Brenner, James Lederer, Deepak A. Rao

Northshore – Betty Diamond, Anne Davidson, Arnon Arazi

UCSF – David Wofsy, Maria Dall'Era, Raymond Hsu

NYU – Jill Buyon, Michael Belmont, Peter Izmirly, Robert Clancy, Phillip Carlucci, Kristina Deonaraine

Einstein – Chaim Putterman, Beatrice Goilav

Hopkins – Michelle Petri, Andrea Fava, Jessica Li

MUSC – Diane L. Kamen

Cincinnati – David Hildeman, Steve Woodle

Broad – Nir Hacohen, Paul Hoover, Thomas Eisenhaure, Michael Peters, Arnon Arazi, Tony Jones, David Lieb

Rockefeller – Thomas Tuschl, Hemant Suryawanshi, Pavel Morozov, Manjunath Kustagi

UCLA – Maureen McMahon, Jennifer Grossman

UCSD – Ken Kalunian

Michigan – Matthias Kretzler, Celine Berthier, Jeffery Hodgkin, Raji Menon

Texas Tech – Fernanda Payan-Schober, Sean Connery

Cedars – Mariko Ishimori, Michael Weisman

## **Study population**

SLE patients 16 years or older were recruited between January 2016 and May 2021 at 14 clinical sites across the United States as part of the Accelerating Medicines Partnership (AMP) RA/SLE Phase II study (2, 3) if 1) they fulfilled American College of Rheumatology or Systemic Lupus International Collaborating Clinics classification criteria for SLE, 2) had a clinically-indicated renal biopsy for a UPCR > 0.5 (4, 5) and 3) had biopsy-confirmed lupus nephritis of class III, IV and/or V, based on the International Society of Nephrology/Renal Pathology Society (ISN/RPS) (6). Patients with a history of renal transplantation, a medical condition considered at risk of participating by the investigator, who were pregnant at the time of study entry, or who were exposed to rituximab within the past six months were excluded. Healthy controls were recruited from 2 of the clinical sites.

## **Data and sample collection**

Data was collected at each site, including patient demographics (age, sex, ethnicity and race), clinical characteristics, medications, and laboratory tests. Renal biopsies were scored according to the ISN/RPS classification (proliferative : class III, IV +/- V, or membranous : class V), and the NIH activity and chronicity indices (6) at each site, followed by a central read by two independent renal pathologists for 101 biopsies. Central reads, including a detailed subscore of the NIH activity and chronicity indices, were used if available; otherwise, total scores from site reads were used. Renal response to treatment was determined clinically at week 52 in patients with a baseline UPCR ratio  $\geq 1$ , as : complete (UPCR <0.5, normal serum creatinine  $\leq 1.3$  mg/dL or, if abnormal, <125% of baseline, and prednisone  $\leq 10$ mg/day), partial (>50% reduction in UPCR without meeting UPCR criterion for CR, normal creatinine  $\leq 1.3$  mg/dL or, if abnormal,  $\leq 125\%$  of baseline, and prednisone dose  $\leq 15$  mg/day), or none (3). Blood samples were collected from patients with LN and controls at baseline (week 0), and a subset of patients with LN were recollected at weeks 12 and 52. PBMCs were isolated from blood samples and cryopreserved at each site as

previously described (7). Cryopreserved PBMC were shipped to the central AMP RA/SLE Biorepository, Oklahoma Medical Research Foundation Biorepository, for storage until sample collection was complete. A total of 275 samples were collected from 152 patients with LN and 40 controls (**Supplemental Figure 1A**).

### **Sample staining and data acquisition by mass cytometry**

PBMC samples were cryopreserved with an optimized protocol (7) and were sent to the Brigham and Women's Hospital CyTOF Antibody Resource and Core for mass cytometry (**Supplemental Figure 1A**). Samples were then randomly assigned to 23 staining and acquisition days (batches), with 20 samples processed per day, ensuring a balanced distribution of LN and control samples across all batches (**Supplemental Figure 1A**). Samples were thawed, stained and mass cytometry data was generated according to the AMP RA/SLE mass cytometry processing workflow, and as previously reported (8). Samples were thawed in a 37 °C water bath for 3 minutes and then mixed with 37 °C thawing media containing: RPMI Medium 1640 (Life Technologies #11875-085) supplemented with 5% heat-inactivated fetal bovine serum (Life Technologies #16000044), 1 mM GlutaMAX (Life Technologies #35050079), antibiotic-antimycotic (Life Technologies #15240062), 2 mM MEM non-essential amino acids (Life Technologies #11140050), 10 mM HEPES (Life Technologies #15630080),  $2.5 \times 10^{-5}$  M 2-mercaptoethanol (Sigma-Aldrich #M3148), 20 units/mL sodium heparin (Sigma-Aldrich #H3393), and 25 units/mL benzonase nuclease (Sigma-Aldrich #E1014). 100  $\mu$ L aliquots of each sample post-thaw were mixed with PBS (Life Technologies #10010023) at a 1:1 ratio to be counted by flow cytometry.

Each sample was then split into 4 to be stained with 4 different panels including lineage and specific markers dedicated to examining B, T, myeloid, and NK cells (**Supplemental Tables 6-9**,



**Supplemental Figure 10-11**). Overall, between  $0.5 - 1.0 \times 10^6$  cells were stained per panel for each sample. If the sample before splitting included  $< 2 \times 10^6$ , a panel priority was used: B panel > T panel > Myeloid panel > NK panel (**Supplemental Figure 1A**). All samples were transferred to a polypropylene plate (Corning #3365) to be stained at room temperature for the rest of the experiment. The samples were spun down and aspirated. Rhodium viability staining reagent (Standard BioTools #201103B) was diluted at 1:1000 and added for five minutes. 16% stock paraformaldehyde (Fisher Scientific #O4042-500) was diluted to 0.4% in PBS and added to the samples for five minutes. After centrifugation and aspiration, Human TruStain FcX Fc receptor blocking reagent (BioLegend #422302) was used at a 1:100 dilution in cell staining buffer (CSB) (PBS with 2.5 g bovine serum albumin [Sigma Aldrich #A3059] and 100 mg of sodium azide [Sigma Aldrich #71289]) for 10 minutes followed by incubation with conjugated surface antibodies (each marker was used at a 1:100 dilution in CSB, unless stated otherwise) for 30 minutes. The Harvard Medical Area CyTOF Antibody Resource and Core (Boston, MA) prepared and validated all antibodies. After centrifugation, samples were resuspended with culture media. 16% stock paraformaldehyde (Fisher Scientific #O4042-500) dissolved in PBS was used at a final concentration of 4% for 10 minutes to fix the samples before permeabilization with the FoxP3/Transcription Factor Staining Buffer Set (ThermoFisher Scientific #00-5523-00). The samples were incubated with SCN-EDTA coupled palladium barcoding reagents for 15 minutes, followed by incubation with Heparin (Sigma-Aldrich #H3149-100KU) diluted 1:10 in PBS. Samples were combined and filtered in a polypropylene tube fitted with a 40 $\mu$ m filter cap. Conjugated intracellular antibodies were added into each tube and incubated for 30 minutes. Cells were then fixed with 4% paraformaldehyde for 10 minutes. DNA was labeled for 20 minutes to identify single-cell events with an 18.75  $\mu$ M iridium intercalator solution (Standard BioTools #201192B). Samples were subsequently washed and reconstituted in Cell Acquisition Solution (CAS) (Standard BioTools #201240) in the presence of EQ Four Element Calibration beads (Standard BioTools

#201078) at a final concentration of  $1 \times 10^6$  cells/mL. Samples were acquired on a Helios CyTOF Mass Cytometer (Standard BioTools).

### **Mass cytometry data processing and quality control**

Raw FCS files were normalized to reduce signal deviation between samples during multi-day batch acquisitions, based on the bead standard normalization method established by Finck et al. (9). The normalized files were then compensated with a panel-specific spillover matrix to subtract cross-contaminating signals (10). These compensated files were then deconvoluted into individual sample files using a single cell-based debarcoding algorithm established by Zunder et al (11). Normalized and debarcoded FCS files were then uploaded to OMIQ software from Dotmatics ([www.omic.ai](http://www.omic.ai), [www.dotmatics.com](http://www.dotmatics.com)), as previously reported (8). Manual gating on Gaussian parameters and DNA was applied to remove debris, outlier events, and doublets. Singlet live cells were then identified by gating on bead-negative and Rhodium-negative cell events. All proteins in each panel were examined and included in further analysis, except for IgG and IgA in the B panel, due to an identified strong co-expression of both markers that was determined to be a technical limitation. The data was further evaluated for quality control by examining the proportion of viable cells, the presence and frequency of major cell types (B, T, myeloid, and NK) and the distribution of samples using unsupervised clustering with opt-SNE dimensionality reduction and PARC clustering (12), available in the OMIQ software from Dotmatics ([www.omic.ai](http://www.omic.ai), [www.dotmatics.com](http://www.dotmatics.com)). Samples were excluded from further analysis if they presented one or several quality issues: cell viability < 50%, 0 B cells, and samples identified mostly (>90%) in one PARC cluster (**Supplemental Figure 1A, Supplemental Table 2**).

### **Single-cell proteomic data transformation and batch correction**

The data generated from each panel was analyzed using the same workflow: after quality control filtering, FCS files including live singlet cells were read in R (R version 4.3.1) using the flowCore

package (version 2.14.0) and were arcsinh-transformed with a cofactor of 5, as described (13). We leveraged the single-cell transcriptomic analysis pipeline from the Seurat package (version 4.3.0) (14) by transposing our transformed expression matrix, and implementing our matrix into a Seurat object with the corresponding metadata. To ensure equal representation of samples and to save computational time and resources, we randomly downsampled each sample to 10,000 cells (if a sample had < 10,000 cells, all cells were kept, **Supplemental Figure 1B**), as downsampling does not affect the sensitivity of subsequent analysis (8). We used principal component analysis (PCA) for dimensionality reduction (function RunPCA, set without approximation) from the Seurat package and then corrected batch effects with the function RunHarmony based on the Harmony (15) application programming interface implemented in the Seurat package, using the first 20 PCs (**Supplemental Figure 1C-D**). We confirmed the integration of the batches using the function compute\_lisi from the LISI package (version 1.0) (15) (**Supplemental Figure 1E**).

### **Single-cell proteomic graph-based clustering and neighborhood analysis**

After batch correction, we obtained a nearest-neighbor graph (function FindNeighbors) and clusters based on a Louvain-based algorithm (function FindCluster) from the Seurat package, using a resolution of 0.5 for all panels (14). Cells were then projected into two dimensions using the runUMAP function based on the 20 first harmonized PCs, with the following arguments: metric = cosine, min.dist = 0.08, spread = 1. We annotated each cluster as T, B (including clusters with a plasmablast phenotype), Myeloid (including clusters with a plasmacytoid dendritic phenotype, basophil phenotype, and neutrophil phenotype) or NK cells based on lineage markers in each panel (**Supplemental Figure 1F-H**). Clusters that were not attributed clearly to one of these cell types were labeled undetermined and were excluded from further analysis (< 0.2% of total live cells for each panel) (**Supplemental 1G**). As a second step, we extracted the cell type of interest in the dedicated panel (e.g., T cells in the T panel) and re-clustered the cells by applying again

the functions: RunPCA(), RunHarmony(), FindNeighbors() with a k=30, FindCluster() and RunUMAP(). For the Louvain-based algorithm, we optimized resolution for each cell type (0.8 for B cells, 0.7 for T cells, 0.3 for Myeloid cells, 0.3 for NK cells), based on the cluster distribution and manual check of expression of critical proteins in each cluster to gain the biological interpretations that made the most sense, with some level of over-clustering, as recommended (13). Cell-type specific clusters were labeled with a first letter corresponding to the panel they were extracted from, and a number based on the cluster size (e.g., the cluster “B0” corresponds to the largest cluster within B cells extracted from the B panel).

To visualize protein expression, we used arcsinh-transformed data and employed multiple plot types adapted from the Seurat package: 1) Dotplots to display all proteins within each cluster with dot color representing the average unscaled expression and dot size indicating the percentage of cells with non-zero values; 2) Violin plots to show the distribution of a selection of proteins, where the minimal and maximal thresholds were data-driven by the cells expressing the lowest and highest expression; 3) Feature plots to map a selection of protein expression in the UMAP space, with the same min-max threshold definition than in 2).

### **Cytometric type I interferon score calculation**

To define a cytometric type I IFN score, we first identified any proteins in our panels that had been previously and repeatedly used as a gene or a protein associated with type I interferon signaling (16–18). Median expression of MX1 and ISG15 was calculated amongst total live cells, as the expression was broadly observed for both markers, and median SIGLEC-1 was measured amongst myeloid cells, as no other cell type expressed it (**Supplemental Figure 3C**). For each sample stained with these three panels (T, B and myeloid), the values for each marker were standardized to the mean and standard deviation of the controls and then summed to obtain a score.

### **TCF1 protein, *TCF7* gene expression and stemness score association with interferon**

To identify the differential expression markers between two T CD4 naïve clusters associated with type I interferon signature, we used the limma package, a method used previously to evaluate differential expression in mass cytometry dataset (19), to compute the p values for each marker included in the T panel. After identifying TCF1 as the most differentially expressed marker, we examined its expression (gene *TCF7*), as well as the expression of Ki67 (gene *MKI67*, a marker of proliferation), in naïve T CD4<sup>+</sup> and T CD8<sup>+</sup> cells after stimulation with CD3/CD28 with or without IFN beta, using a publicly available RNAseq dataset (GSE195541) (20).

In addition, we used a previously reported dataset including single-cell RNAseq data of T cells from 7 patients with active lupus erythematosus before and after treatment with an IFN receptor blockade (anifrolumab) (21). Raw data is available through dbGAP as study phs003582.v1.p1, and sample collection, data generation and processing is detailed in (21). We examined the expression of *TCF7* and *LEF1* in T cells, two genes associated with T cell stemness, before and after treatment (22). The stemness score was calculated using the AddModuleScore function from the Seurat package. Median expression of the stemness score for each sample was used to determine statistical difference before and after treatment, using a paired Wilcoxon test.

### **Supervised approaches for disease or renal features association testing**

To identify LN-associated cells or histology features-associated cells, we applied co-varying neighborhoods analysis (CNA) (23) using its R version (rcna package, version 0.0.99) implemented in the Seurat package (association.Seurat function). CNA defines data-driven neighborhoods (here referring to small regions of cells sharing proteomic similarities) and measures the relative abundance of cells from each sample across all neighborhoods. By further applying PCA to the neighborhood abundance matrix, CNA identifies dominant axes of variation

(NAM-PCs) in cell neighborhood abundance across samples and further allows to test for clinical association including potential covariates, in a linear model. For each model run, the function provides the global CNA p-value, which is defined through a permutation test, and the cell-neighborhoods that passes a threshold of  $FDR < 0.05$  (23). Global CNA p value and significant local associations ( $FDR < 0.05$ ) were reported and mapped in the UMAP space. CNA associations were validated at a cell subset (cluster) level by comparing its median cell correlation coefficient with the odds ratio defined by a separate single-cell statistical approach, the mixed-effects association of single cells (MASC) (24) (**Supplemental Figure 12A**); notably, CNA was robust to small cluster outliers (**Supplemental Figure 12B**). To identify disease-associated signaling pathway activation, we assessed the correlation between each marker's expression and the axis of greatest variance (NAM-PC1) defined by each CNA model. This was done at a single-cell level using Spearman's correlation coefficient, calculated with the `rcorr` function from the `Hmisc` package (version 5.1-1).

### **Unsupervised approaches to identify immune cell profiles at a sample-level**

To identify hidden circulating cellular profiles at a sample-level, we applied unsupervised machine learning approaches using the proportions of each cell subsets for each PBMC sample (e.g. % B0 / total B cells, % B1 / total B cells, % T0 / total T cells, etc). To prevent signals from cell cluster outliers, we removed cell subset clusters that included more than 50% of samples with a zero value (examples shown in **Supplemental Figure 12B**); we excluded three T cell clusters (T21, T22, and T23), three B cell clusters (B14, B15, and B16) and two myeloid clusters (M10 and M12). Only samples stained with all panels (T, B, Myeloid and NK) were included in these analysis. We obtained a matrix of 55 cell subset (=cell cluster) proportions with each sample represented by a row and each cell subset proportion represented by a column.

Hierarchical clustering of cell subset co-abundance matrix. For this analysis, we first obtain Spearman's rho correlation coefficient and p values between all cell subset proportions and the cytometric interferon score including baseline samples from patients with LN. Spearman's rho correlation coefficient and p values were calculated using the `rcorr` function from the `Hmisc` package, and the FDR were obtained using the `p.adjust` function from the `stats` package (version 4.3.1). Correlation coefficients were then organized using a hierarchical unsupervised clustering algorithm with Ward distance method, and visualized using the R package `corrplot` (version 0.92) (**Figure 3A, Supplemental Figures 6A**).

K-means grouping of samples (= referred to as LN groups). For the second unsupervised approach, we applied a K-means clustering algorithm to group LN and control samples based on their scaled proportions of cell subsets. We tested the stability of different numbers of K (=groups) by repeating 1000 K-means clustering on a resampled dataset without replacement and confirmed > 80% of stability for our final approach, using the `ConsensusClusterPlus` package (version 1.66.0) (25) (**Supplemental Figure 7A**). The final K-means clustering was performed with a K=3 using the `kmeans` function from the `stats` package, resulting in the groups (= blood-defined groups) labelled as G0, G1 and G2. We examined that the differences in the groups were reflected in the PCA and UMAP spaces using the `umap` function from the `uwot` package (version 0.1.16) (**Figure 3B, Supplemental Figure 7B**). To identify the cells driving the differences between these groups, 1) we examined the cell subset loadings in the first 2 PCs (**Figure 3C**), 2) we run cell-type specific CNA comparing each group with the others including patients with LN at baseline and used a heatmap to combine the results (**Figure 3G**) and 3) we compared the proportions of a selection of cell subsets, either combined or individually (**Figure 3E-F, Supplemental Figure 7D-F**). For visualization of CNA results, we plotted the frequency of cells within each cell subset passing the FDR threshold of <0.05. All CNA models with cells passing FDR had a global p value of < 0.05.

Baseline demographic, clinical and histological data were compared between these newly defined groups of samples from patients with LN (= LN groups) using univariate and multivariable models, as indicated (**Figure 4, Supplemental Table 3**).

### **SLE-associated auto-antibodies analysis and association with K-means blood-defined groups**

SLE-associated auto-antibodies dataset was previously generated and reported for patients with LN included in the AMP phase II study (26). Briefly, serum samples were screened for autoantibody specificities using the BioPlex 2200 ANA kit (Bio-Rad Technologies). Anti-dsDNA was reported in international units per milliliter and all others as an index based on fluorescence intensity; autoantibody positivity was determined per the manufacturer's recommendations, as previously described (26). To investigate whether autoantibodies were associated with blood-defined groups, we analyzed patients with both paired mass cytometry PBMC data and autoantibodies data, allowing us to assign blood-defined groups to corresponding serum samples at the patient level. To examine differences across the three groups, we used Kruskal-Wallis test for anti-dsDNA and Chi-square or Fisher exact for all other antibodies. To examine differences between G1 and G2, we used Wilcoxon rank sum test for anti-dsDNA and Chi-square or Fisher exact for all other antibodies (**Supplemental Table 4**).

### **Single-cell kidney immune cells analysis and association with K-means blood-defined groups**

As part of the AMP phase II study, baseline human kidney biopsies were cryopreserved, thawed, dissociated, sequenced and processed as described (27). Briefly, following alignment, dimensionality reduction was achieved by identifying variable genes and running PCA, followed by batch correction using Harmony (15), graph-based clustering using Seurat (version 4.1.0)(14).



T and NK cell clusters were identified based on the expression of known lineage markers (Al Souz *et al.*, manuscript in preperation). To investigate whether kidney immune cells were associated with blood-defined groups, we analyzed patients with both paired mass cytometry PBMC data and single-cell RNA-seq kidney data, allowing us to assign blood-defined groups to corresponding kidney samples at the patient level. We then applied CNA (23) to the kidney single-cell RNA-seq data to identify kidney T cell populations associated with blood-defined groups at a single-cell level. Results were further confirmed by comparing the proportions of kidney T cell clusters of interest between blood-defined groups. To evaluate type I IFN signaling between blood-defined groups, we used the AddModuleScore function (Seurat package) to define type I IFN score based on a previously described 21-gene list (16), and compared the gene type I IFN score in the kidney immune cells between the blood-defined groups (**Supplemental Figure 5D**).

### **Urine proteomics analysis and association with K-means blood-defined groups**

We further leveraged the urine proteomic dataset previously generated and reported for patients with LN included in the AMP phase II study (3). Briefly, the screening was performed using an extended version of the Kiloplex Quantibody (RayBiotech) and the concentration of each analyte was normalized by urine creatinine to account for urine dilution. To investigate whether urine proteomic were associated with blood-defined groups, we included patients with both paired mass cytometry PBMC data and urine proteomic data, allowing us to assign blood-defined groups to corresponding urine samples at a patient level. We compared the abundance of urine proteins in  $\text{pg}_{\text{protein}}/\text{mg}_{\text{creatinine}}$  between blood-defined groups of patients with LN using a Wilcoxon rank sum test and adjusting for FDR, with a threshold of  $< 0.10$  and  $< 0.25$  as indicated (**Supplemental Figure 5E**).

### **Statistics**

In addition to the statistical testing mentioned above, we used non-parametric tests for cross-sectional univariate analysis at baseline: Wilcoxon rank sum test to compare continuous or ordinal variables between two groups, Kruskal-Wallis test followed by post hoc Dunn's test to compare continuous or ordinal variables between more than two groups, or Spearman's rho to assess the correlation between two continuous or ordinal variables (using `wilcox.test`, `kruskal.test`, `dunn_test`, `cor.test` with the method `spearman` functions in R). To compare categorical variables between groups, we used Fisher exact test and Chi-squared test depending on the size of the tested categories (using `fisher.test` and `chisq.test` functions in R). For multivariable models, we used linear regression models or generalized linear models for logistic regression (`lm` and `glm` function in R) to test for association with a continuous or categorical variable, respectively, including the covariate as indicated. To compare LN groups using logistic regression models, we applied a one-vs-rest strategy to examine the specific characteristic of one group compared to the others. To test for clinical and renal factors associated with the variation of selected cell subsets of interest, we applied a linear model with penalization using an elastic net regression (`glmnet` function used with the `caret` package) after 10 random repeats of a 10-fold cross-validation, including the cell proportion as the response variable and the clinical and renal variables as 'predictor' variables. All predictor variables were normalized to a fixed range between 0 and 1. For all above cross-sectional analysis, missing clinical data or samples were excluded from statistical testing. For longitudinal data, we used mixed effect models (`lmer` function from the `lme4` package, version 1.1-34) to test for change over time by including each patient as a random factor to account for paired samples. For longitudinal data, we included all patients with a defined response status at 1 year who had at least two separate samples. All statistical tests were two-sided. For data visualization, we used the packages `ggplot`, `ComplexHeatmap` and `corrplot`. All analysis were performed on R version 4.3.1. A p value less than 0.05 was considered significant.

**Study approval**

All participants provided written informed consent before study enrollment, and human study protocols were approved in accordance with the Declaration of Helsinki by the institutional review boards (IRBs) at each participating sites, which included: Johns Hopkins University, New York University, University of Rochester Medical Center, Oklahoma Medical Research Foundation, University of Cincinnati, Albert Einstein College of Medicine, University of California San Francisco, Northwell Health, Medical University of South Carolina, Texas University El Paso, University of Michigan, University of California San Diego, University of California Los Angeles, Cedars-Sinai Medical Center.

## References

1. Hoover PJ, Costenbader KH. Insights into the epidemiology and management of lupus nephritis from the US rheumatologist's perspective. *Kidney Int.* 2016;90(3):487–492.
2. Izmirly PM, et al. Longitudinal patterns and predictors of response to standard-of-care therapy in lupus nephritis: data from the Accelerating Medicines Partnership Lupus Network. *Arthritis Res Ther.* 2024;26(1):54.
3. Fava A, et al. Urine proteomic signatures of histological class, activity, chronicity, and treatment response in lupus nephritis. *JCI Insight.* 2024;9.
4. Fanouriakis A, et al. 2019 Update of the Joint European League Against Rheumatism and European Renal Association-European Dialysis and Transplant Association (EULAR/ERA-EDTA) recommendations for the management of lupus nephritis. *Ann Rheum Dis.* 2020;79(6):713–723.
5. Kidney Disease: Improving Global Outcomes (KDIGO) Glomerular Diseases Work Group. KDIGO 2021 Clinical Practice Guideline for the Management of Glomerular Diseases. *Kidney Int.* 2021;100(4S):S1–S276.
6. Bajema IM, et al. Revision of the International Society of Nephrology/Renal Pathology Society classification for lupus nephritis: clarification of definitions, and modified National Institutes of Health activity and chronicity indices. *Kidney Int.* 2018;93(4):789–796.
7. Bocharnikov AV, et al. PD-1hiCXCR5- T peripheral helper cells promote B cell responses in lupus via MAF and IL-21. *JCI Insight.* 2019;4(20).
8. Inamo J, et al. Deep immunophenotyping reveals circulating activated lymphocytes in individuals at risk for rheumatoid arthritis. *J Clin Invest.* 2025;135(6).

9. Finck R, et al. Normalization of mass cytometry data with bead standards. *Cytometry A*. 2013;83(5):483–494.
10. Chevrier S, et al. Compensation of Signal Spillover in Suspension and Imaging Mass Cytometry. *Cell Syst*. 2018;6(5):612-620.e5.
11. Zunder ER, et al. Palladium-based mass tag cell barcoding with a doublet-filtering scheme and single-cell deconvolution algorithm. *Nat Protoc*. 2015;10(2):316–333.
12. Stassen SV, et al. PARC: ultrafast and accurate clustering of phenotypic data of millions of single cells. *Bioinformatics*. 2020;36(9):2778–2786.
13. Nowicka M, et al. CyTOF workflow: differential discovery in high-throughput high-dimensional cytometry datasets. *F1000Res*. 2017;6:748.
14. Hao Y, et al. Integrated analysis of multimodal single-cell data. *Cell*. 2021;184(13):3573-3587.e29.
15. Korsunsky I, et al. Fast, sensitive and accurate integration of single-cell data with Harmony. *Nat Methods*. 2019;16(12):1289–1296.
16. Jayne D, et al. Phase II randomised trial of type I interferon inhibitor anifrolumab in patients with active lupus nephritis. *Ann Rheum Dis*. 2022;81(4):496–506.
17. Nakano M, et al. Distinct transcriptome architectures underlying lupus establishment and exacerbation. *Cell*. 2022;185(18):3375-3389.e21.
18. Huijser E, et al. MxA is a clinically applicable biomarker for type I interferon activation in systemic lupus erythematosus and systemic sclerosis. *Rheumatology*. 2019;58(7):1302–1303.

19. Weber LM, et al. diffcyt: Differential discovery in high-dimensional cytometry via high-resolution clustering. *Commun Biol*. 2019;2:183.
20. Sumida TS, et al. Type I interferon transcriptional network regulates expression of coinhibitory receptors in human T cells. *Nat Immunol*. 2022;23(4):632–642.
21. Law C, et al. Interferon subverts an AHR-JUN axis to promote CXCL13+ T cells in lupus. *Nature*. 2024;631(8022):857–866.
22. Escobar G, Mangani D, Anderson AC. T cell factor 1: A master regulator of the T cell response in disease. *Sci Immunol*. 2020;5(53):eabb9726.
23. Reshef YA, et al. Co-varying neighborhood analysis identifies cell populations associated with phenotypes of interest from single-cell transcriptomics. *Nat Biotechnol*. 2022;40(3):355–363.
24. Fonseka CY, et al. Mixed-effects association of single cells identifies an expanded effector CD4<sup>+</sup> T cell subset in rheumatoid arthritis. *Sci Transl Med*. 2018;10(463):eaaq0305.
25. Wilkerson MD, Hayes DN. ConsensusClusterPlus: a class discovery tool with confidence assessments and item tracking. *Bioinformatics*. 2010;26(12):1572–1573.
26. Fava A, et al. Association of autoantibody concentrations and trajectories with lupus nephritis histologic features and treatment response. *Arthritis Rheumatol*. 2024;76(11):1611–1622.
27. Hoover PJ, et al. Intrarenal myeloid subsets associated with kidney injury are comparable in mice and patients with lupus nephritis [preprint]. <https://doi.org/10.1101/2023.06.24.546409>.

Posted on bioRxiv June 25, 2023

Supplemental Figure 1

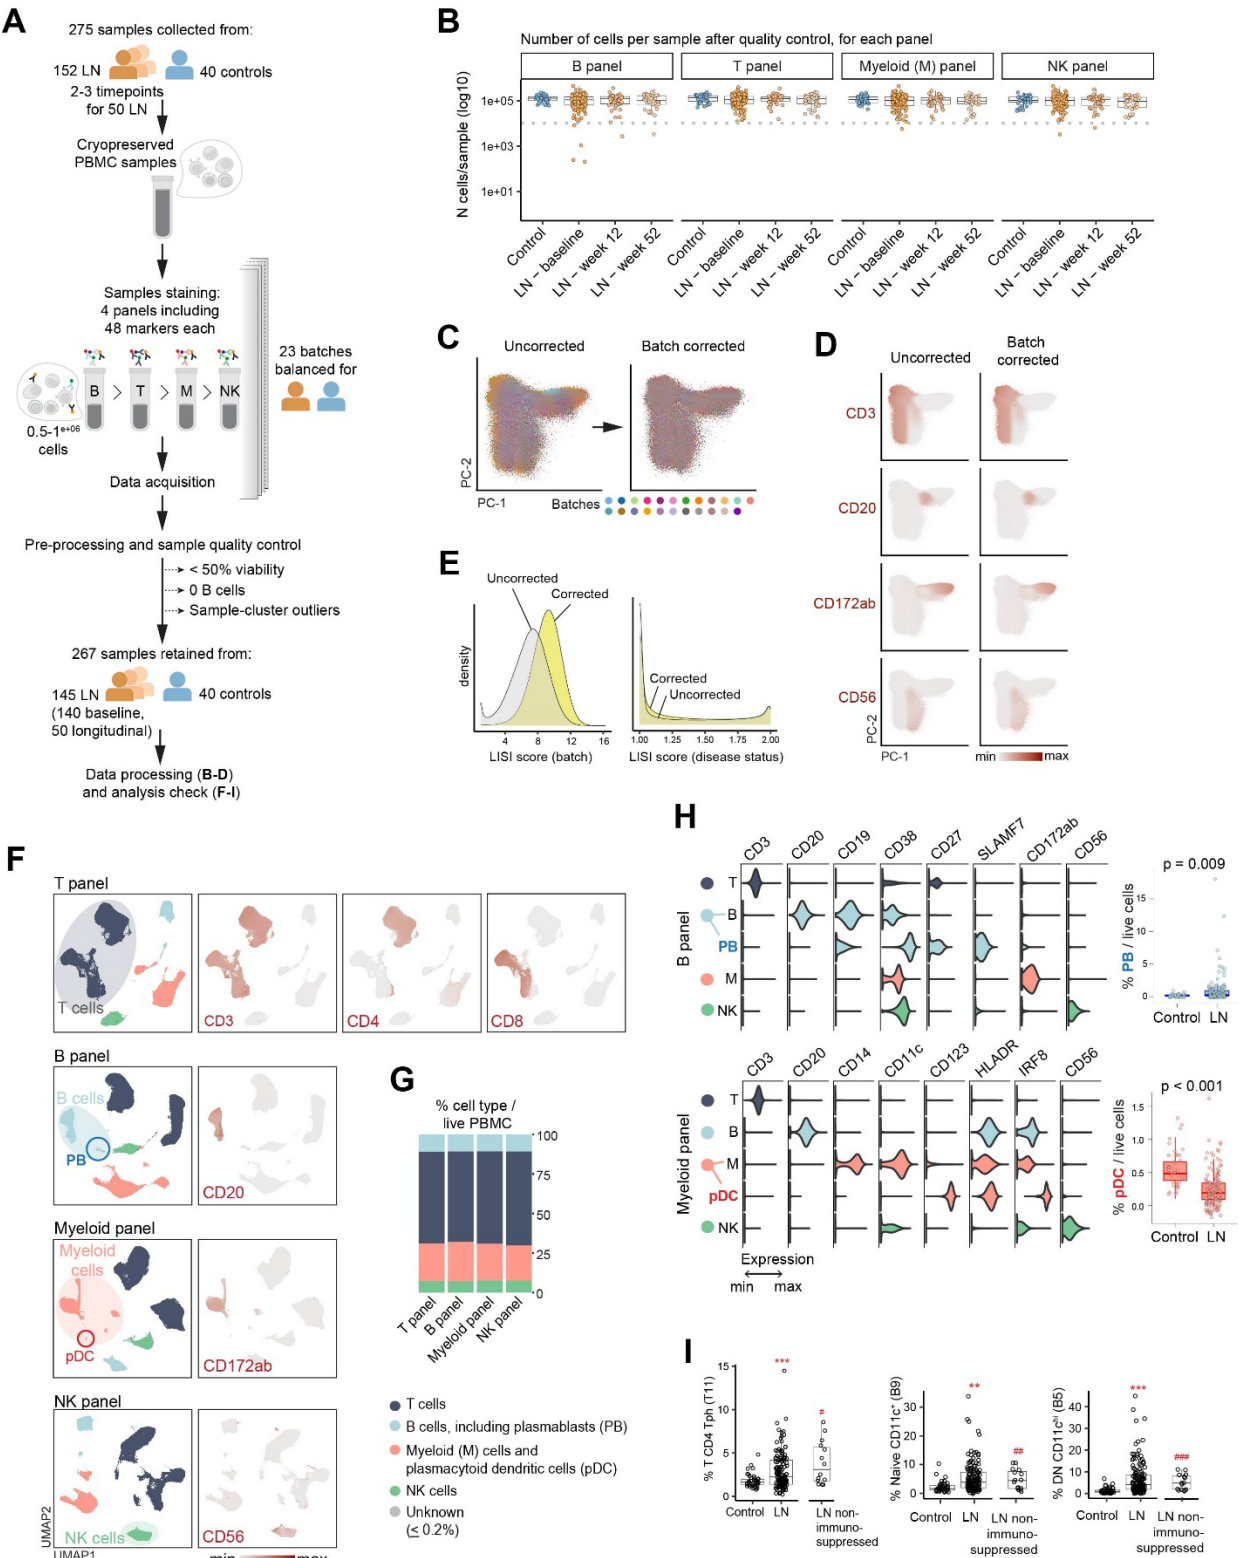

**Supplemental Figure 1. Overview of blood immunophenotyping by mass cytometry in a cohort of lupus nephritis (LN).** (A) Sample processing and quality control pipeline. (B) Number of cells analyzable, after filtering for quality control, in each panel and stratified by disease status and timepoints. The dotted grey line represents the threshold of 10,000, used for downsampling. (C) Representative example of distribution of cells stained with the T panel in the first two principal components, before and after batch correction. (D) Expression of key markers before and after batch correction in the T panel. (E) Local inverse Simpson's index (LISI) scores per cell in the T panel measuring the mixture of cells per batch or disease status (SLE versus control). Increased index represents increased mixture of cells. (F) Identification of major immune cell types within peripheral blood mononuclear cells from 267 samples (from 145 patients with LN and 40 controls) stained with four different panels, in the Uniform Manifold Approximation and Projection (UMAP) space. Key lineage markers by cells are displayed for the four panels. (G) Proportion of the main cell types, amongst total peripheral blood mononuclear cells, stratified by panel. (H) The left panels show key marker expression by the main cell types, and more specifically, by plasmablasts (PB) and plasmacytoid dendritic cells (pDC). The right panels shows the proportions of PB and pDC when comparing all baseline LN patients (n=140 in the B panel and n=125 in the myeloid panel) and controls (n=40); p value obtained by Wilcoxon signed-rank test. (I) Comparison of proportion of specific cell subsets (% Tph amongst T cells and % of CD11c<sup>+</sup> B cells amongst B cells) between 40 controls and baseline LN patients (\*\*p<0.01, \*\*\*p<0.001 by linear regression adjusting for age, sex, ethnicity and race) or between controls and 15 LN without immunosuppression and prednisone  $\leq$  5mg (#p<0.05, ##p<0.01, ###p<0.001 by Wilcoxon signed-rank test).



## Supplemental Figure 2

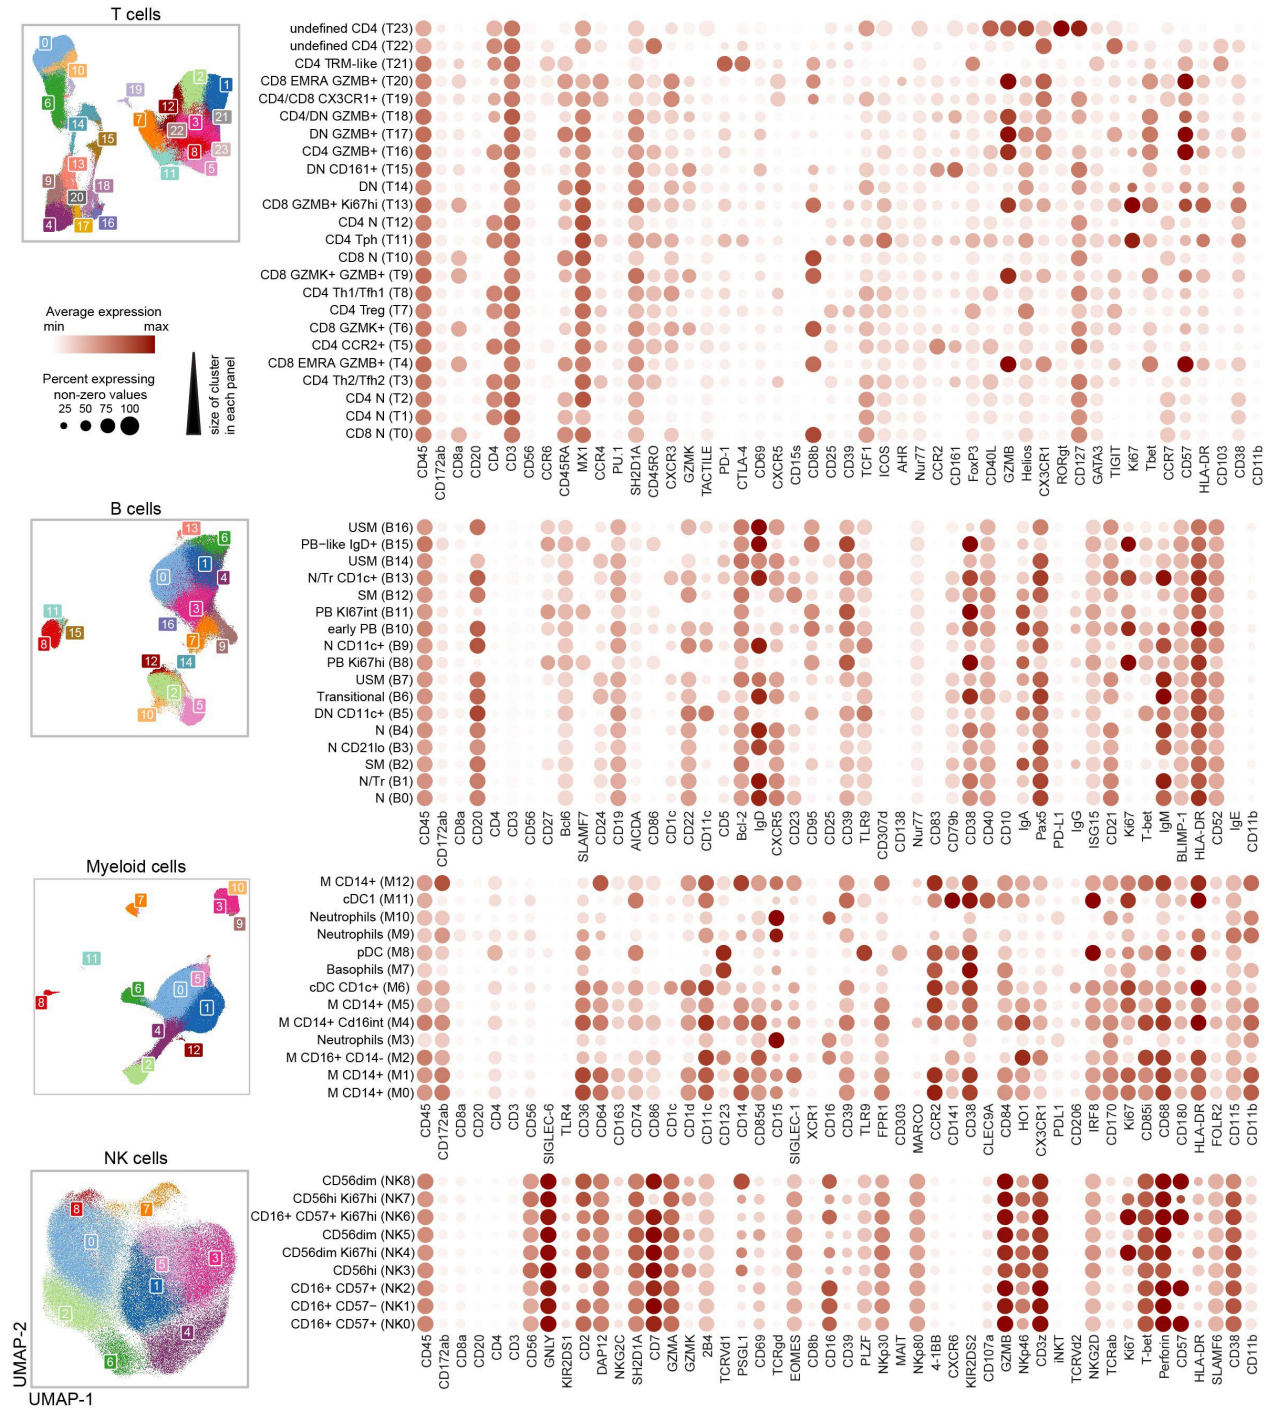

**Supplemental Figure 2. Cell-type specific clustering and marker expression per cluster.** Cell type specific clusters colored in the UMAP space. All proteins included in each panel are shown in the dotplots. Clusters are ordered by size (number of cells) from bottom to top, for each panel.

## Supplemental Figure 3

**A**

Co-varying neighborhood analysis : LN relative to controls at baseline (univariate analysis)

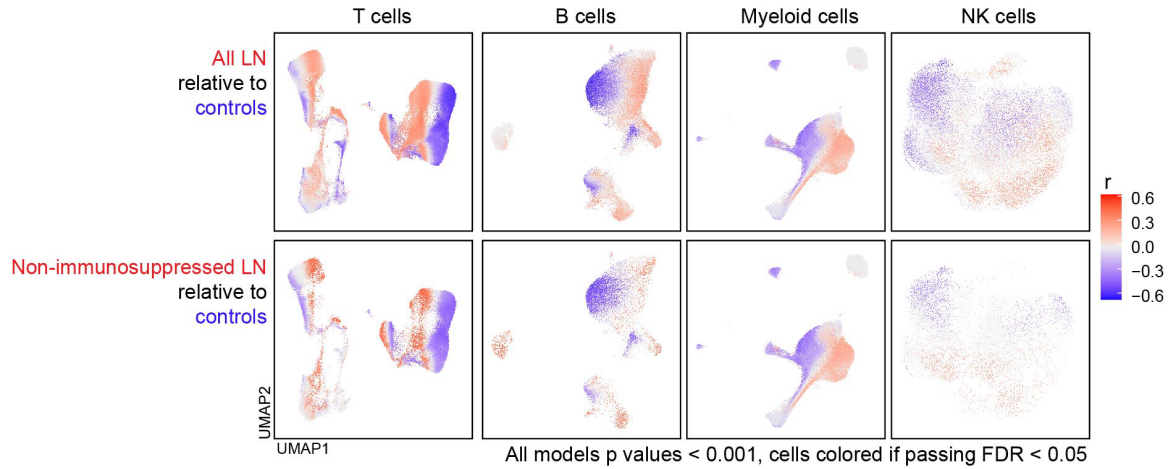

**B**

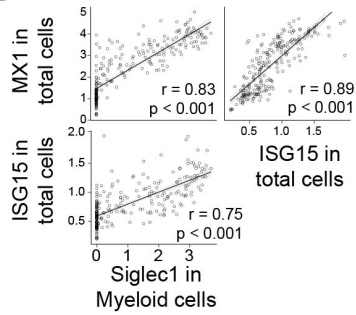

**C**

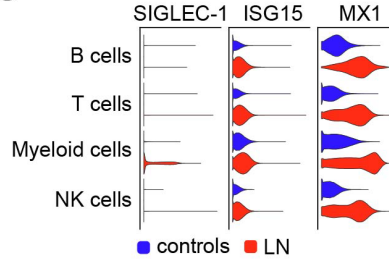

**D**

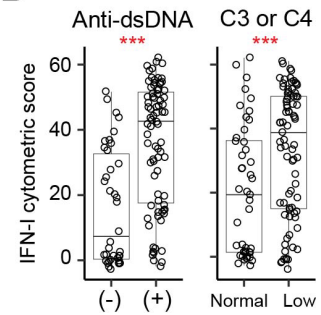

**E**

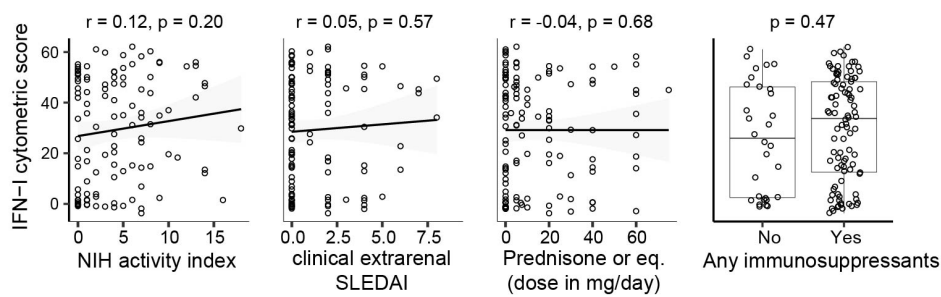

**F**

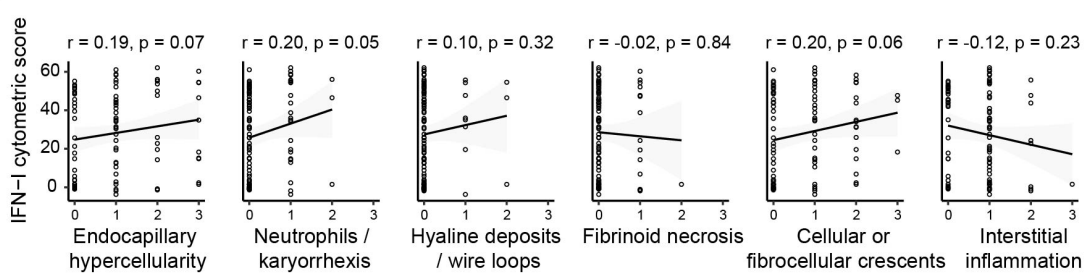

**Supplemental Figure 3. Comprehensive identification of immune alterations in lupus nephritis (LN) patients reveal a proteomic type I interferon signature.** (A) Identification of cells associated with all patients with LN (upper row) or with a subgroup of patients without immunosuppressive therapy and prednisone dose maximum 5 mg at the time of sample collection (max n=15 in the B panel and min n=13 in the NK panel), relative to controls in univariate analysis. (B) Correlation between the median expression per sample of MX1 and ISG amongst total live cells and SIGLEC-1 amongst myeloid cells (Spearman's rho correlation). (C) Distribution of the level of expression of type I interferon induced proteins in major cell types. (D) Comparison of a combined type I interferon score (sum of normalized MX1 and ISG15 in live cells and SIGLEC-1 in myeloid cells) in LN patients with serologic parameters. (G) Lack of association between cytometric type I interferon score and clinical or histologic characteristics, (H) including with the NIH activity subscores, using Wilcoxon rank-sum test or Spearman's rho correlation.

## Supplemental Figure 4

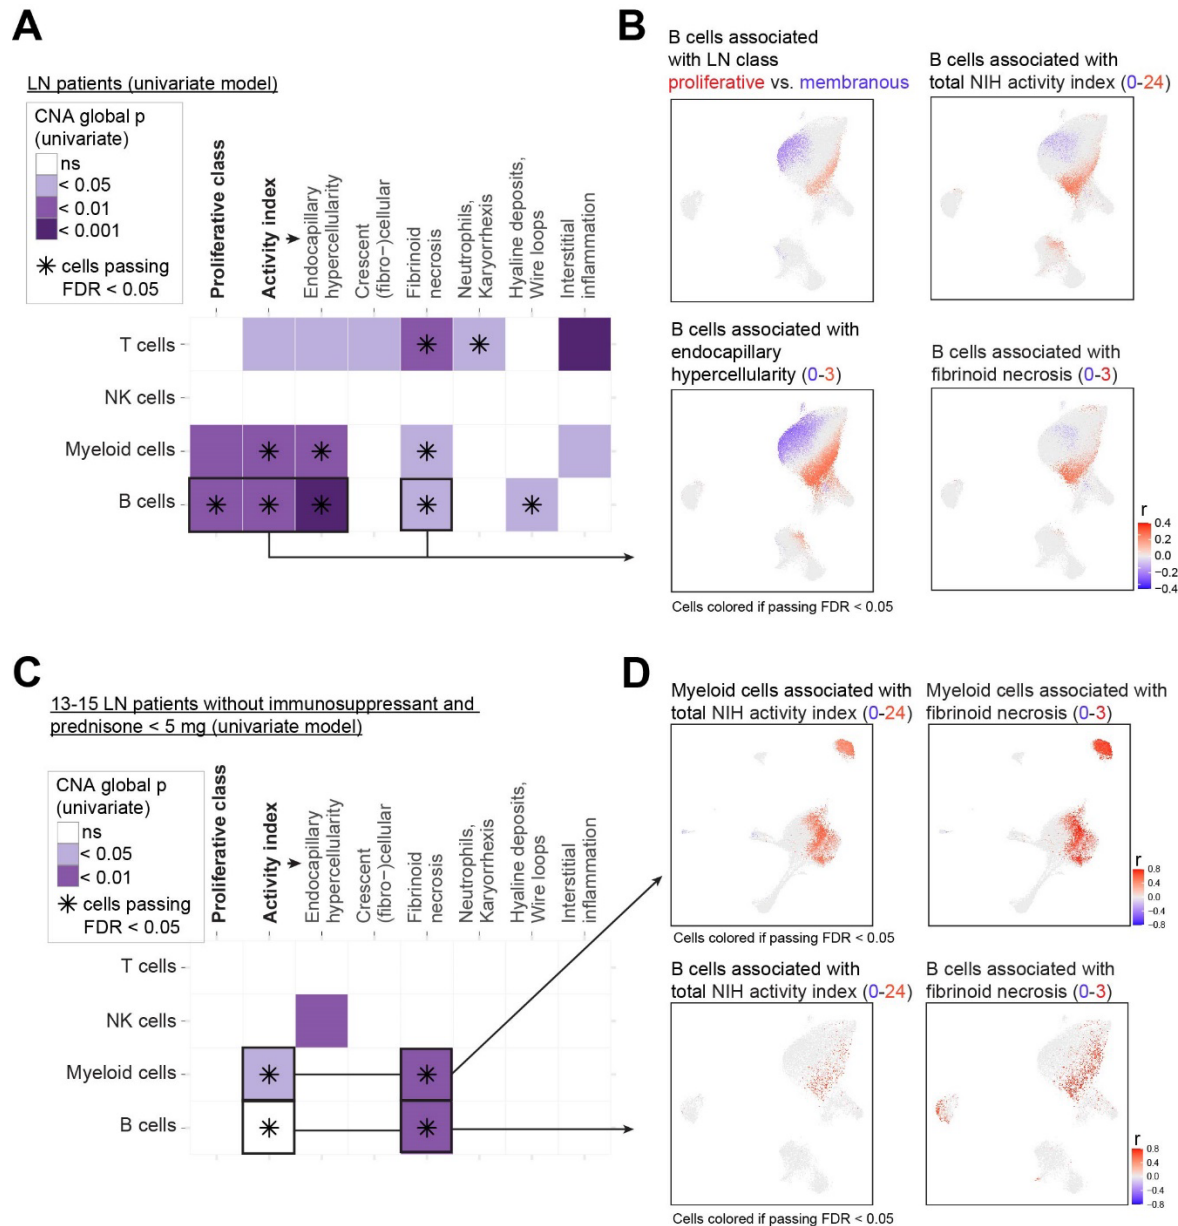

**Supplemental Figure 4. Circulating cell-type specific alterations are associated with histologic patterns of active LN.** (A) Summary of the results testing the association within each blood cell type (y axis) and different histologic patterns of LN disease (x axis). Statistical significance mentioned in the graph were determined using a univariate covarying neighborhood analysis (CNA). (B) Selection of detailed CNA results between B cell alterations and specified histologic characteristics. (C) Summary of CNA results including only LN patients with no immunosuppressive therapy and prednisone  $\leq 5$ mg with (D), representative detailed results in the myeloid and B panels. Multiple testing is adjusted using the false-discovery rate (FDR) as indicated.



## Supplemental Figure 5

**A**

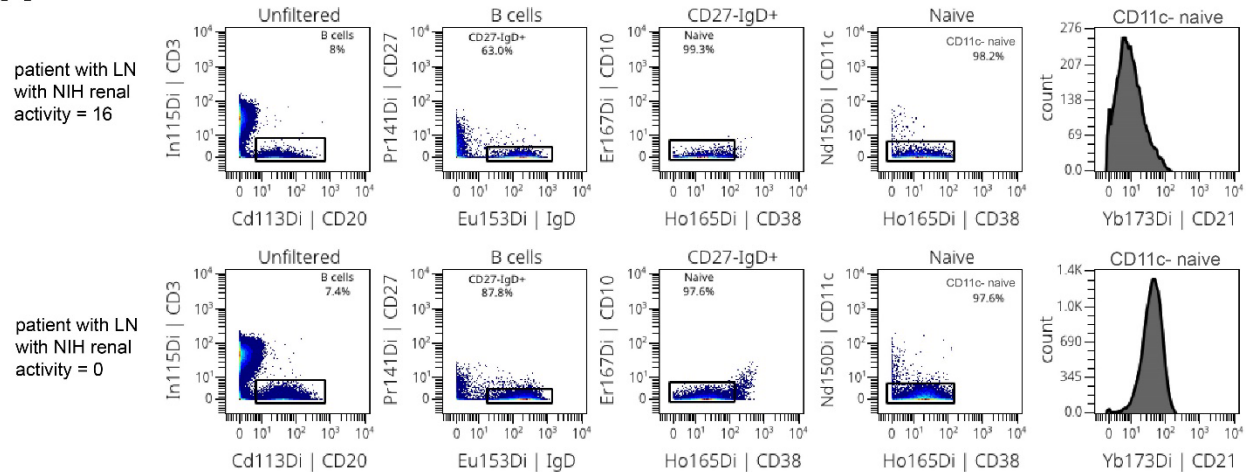

**B**

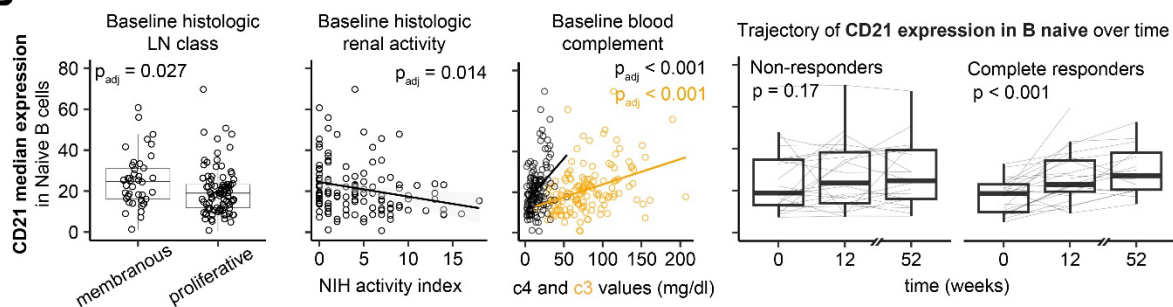

**Supplemental Figure 5. Naïve B cells shift their phenotype towards a low expressing CD19 and CD21 profile in active and proliferative LN patients. (A)** Representative examples of CD21 expression in manually gated naïve B cells in a patient with LN with high vs low NIH renal activity. **(B)** Median CD21 expression amongst naïve B cells association with histological characteristics, complement values (C3 and C4) and longitudinal change over time. Statistical significances were determined either using Wilcoxon sum-rank test (LN class), Spearman's rho correlation (NIH activity index and complement) or a mixed effect model with patient as a random effect (changes over time).

Supplemental Figure 6

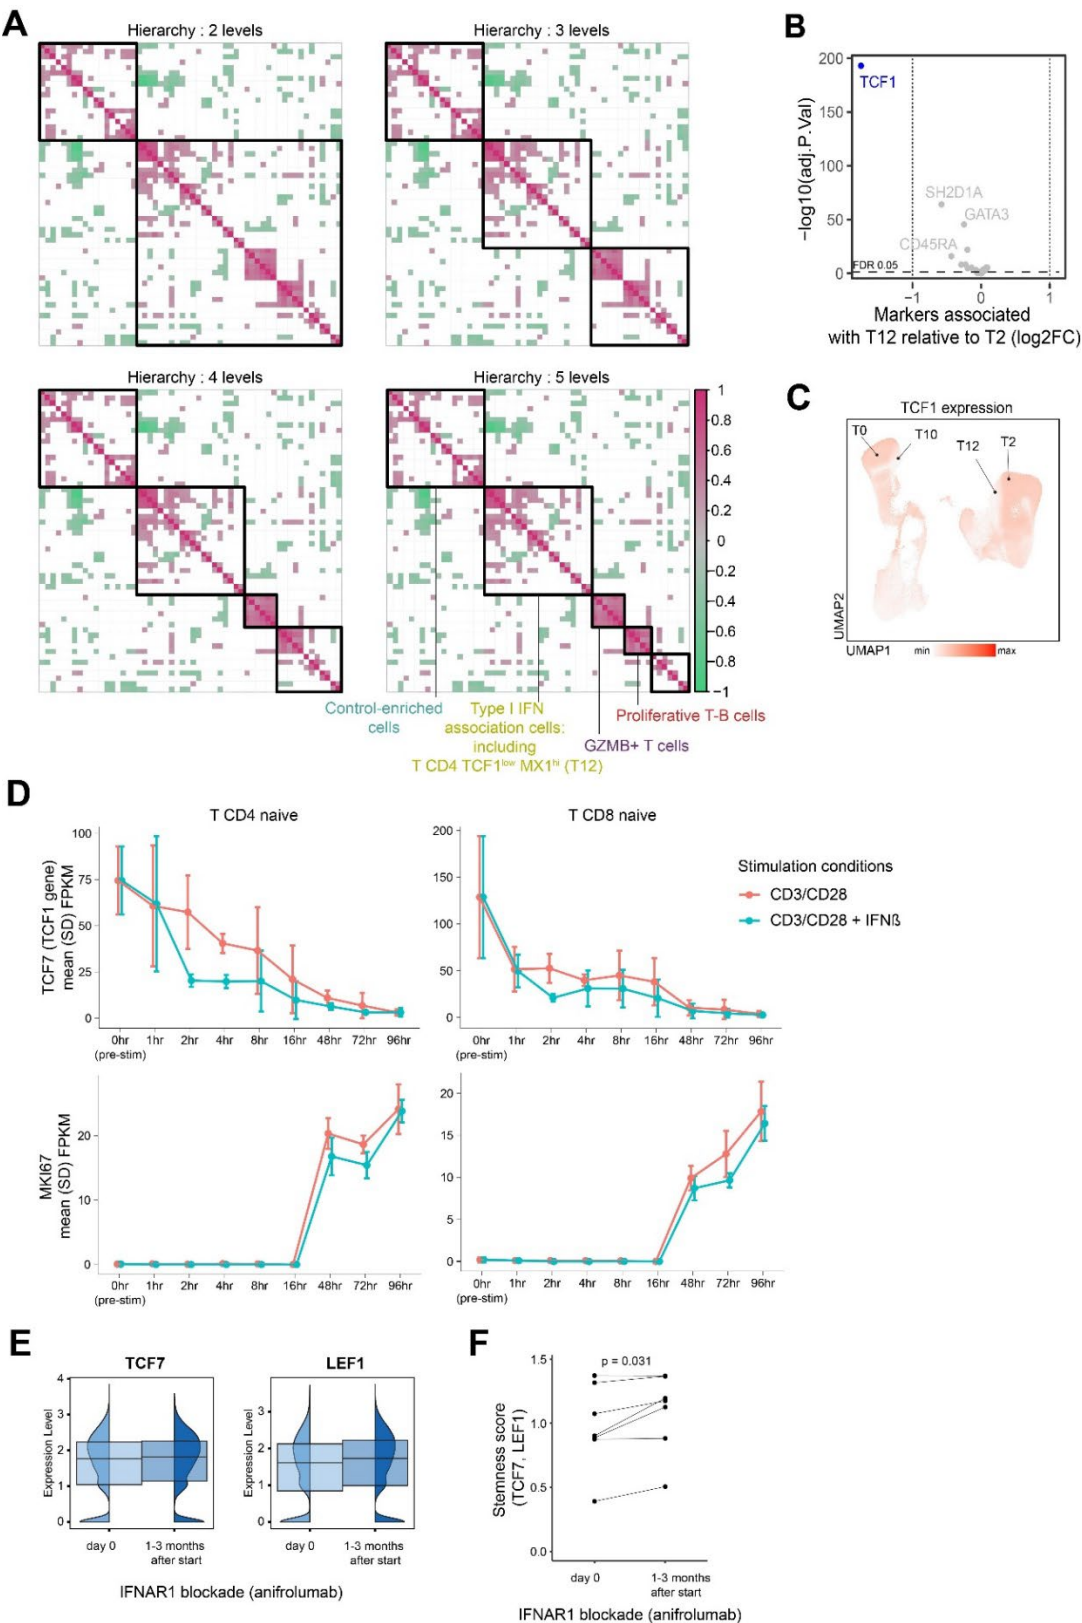

**Supplemental Figure 6. Hierarchical clustering of co-correlated cells identifies cell subsets strongly associated with type I interferon signaling.** (A) Heatmap of correlations between 55 immune cell subsets, organized by hierarchical clustering. Black boxes indicate the first five levels of hierarchy, with key co-correlating cell sets labeled by their defining characteristics. (B) Differential expression of T-panel markers between T-cell subsets T2 and T12, determined using the limma package. (C) UMAP of TCF1 expression in T cells. (D) Changes in TCF7 (TCF1 gene) and MKI67 (Ki67 gene) expression in healthy naïve CD4 and CD8 T cells stimulated with or without interferon- $\beta$ , using published bulk RNA-seq dataset. (E-F) Single-cell representation of TCF7 and LEF1 gene expression (E) and median stemness score (combining TCF7 and LEF1) (F) in T cells from 7 patients with lupus erythematosus before (day 0) and after IFNAR1 blockade treatment (1–3 months post-anifrolumab).

## Supplemental Figure 7

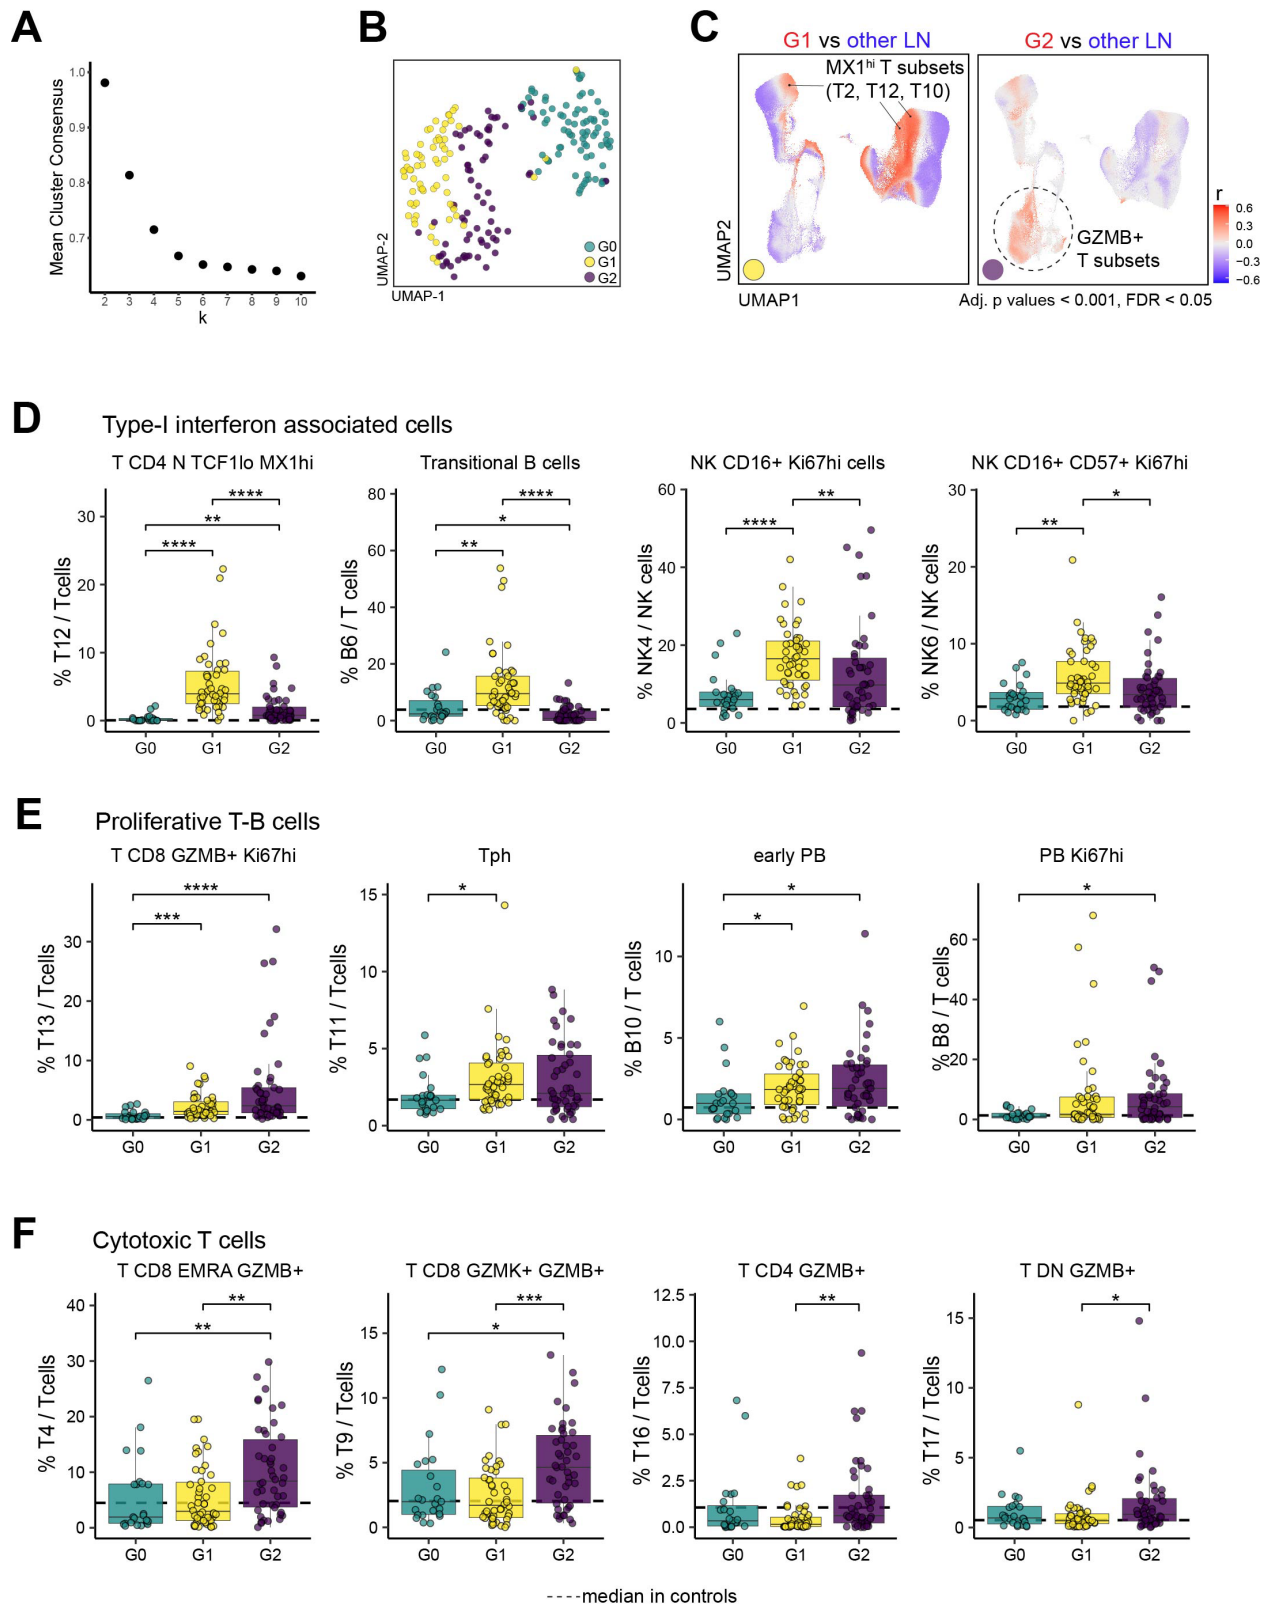



**Supplemental Figure 7. Circulating immune cell subsets characterizing three LN groups.** (A) Stability of sample membership to clusters depending on the number of clusters by repeating 1000 K-means clustering on a resampled dataset without replacement. (B) UMAP distribution of all samples included in this study (n=267) based on the proportion of 55 immune cell subsets. (C) Cell neighborhood associations with the K-means defined groups G1 and G2 relative to the other groups. (D-F) Comparison of selected cell subsets between the three K-means defined groups of LN patients at baseline (23 G0, 46 G1 and 46 G2). Statistical significance was determined by Kruskal-Wallis test followed by Dunn's multiple comparisons.

## Supplemental Figure 8.

Longitudinal changes in all LN patients with at least 2 visits (any treatment regimen)

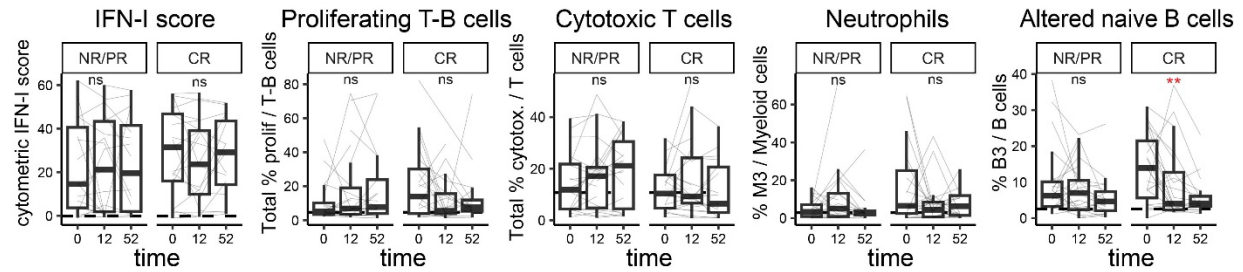

**Supplemental Figure 8. Longitudinal changes in immune cell signatures** stratified by response status (NR/PR = none/partial, CR = complete), including all patients with LN with at least 2 timepoints. Statistical significance was determined using a mixed effect model including patient as a random effect. \* $p < 0.05$ , \*\* $p < 0.01$ , \*\*\* $p < 0.001$ .

## Supplemental Figure 9

**A**

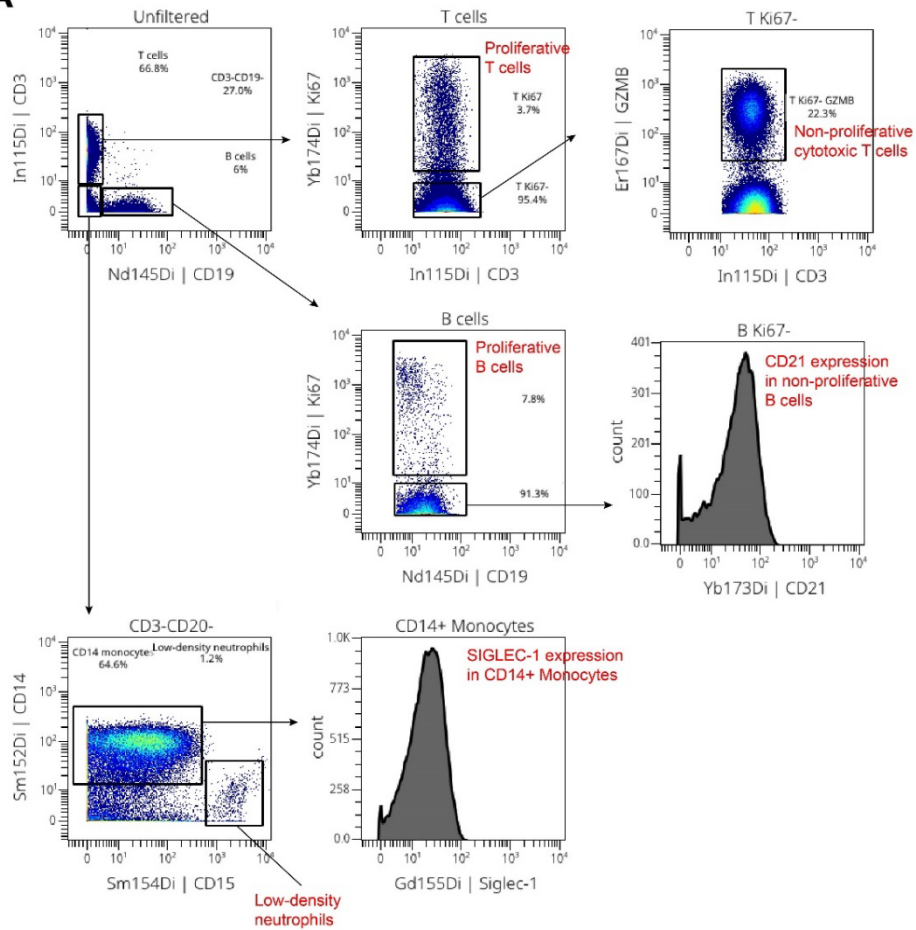

**B**

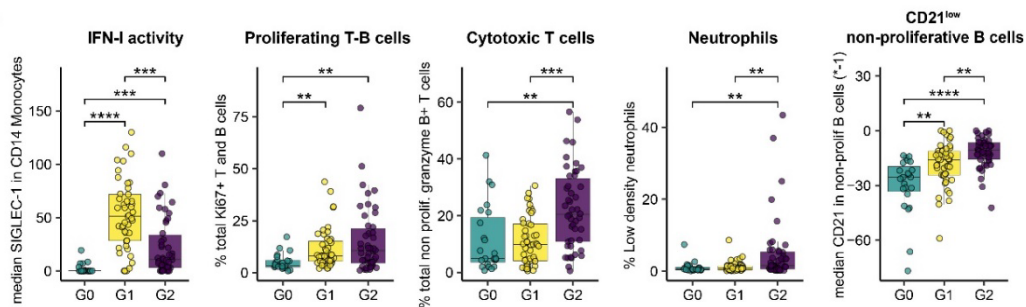

**Supplemental Figure 9. Simplified cellular immunophenotype. (A)** Proposed gating strategy to obtain simplified cellular immunophenotypes. **(B)** Comparison of baseline cellular immunophenotypes between blood-defined LN groups (G0 = 23, G1 = 46, G2 = 46).

## Supplemental Figure 10

**A**

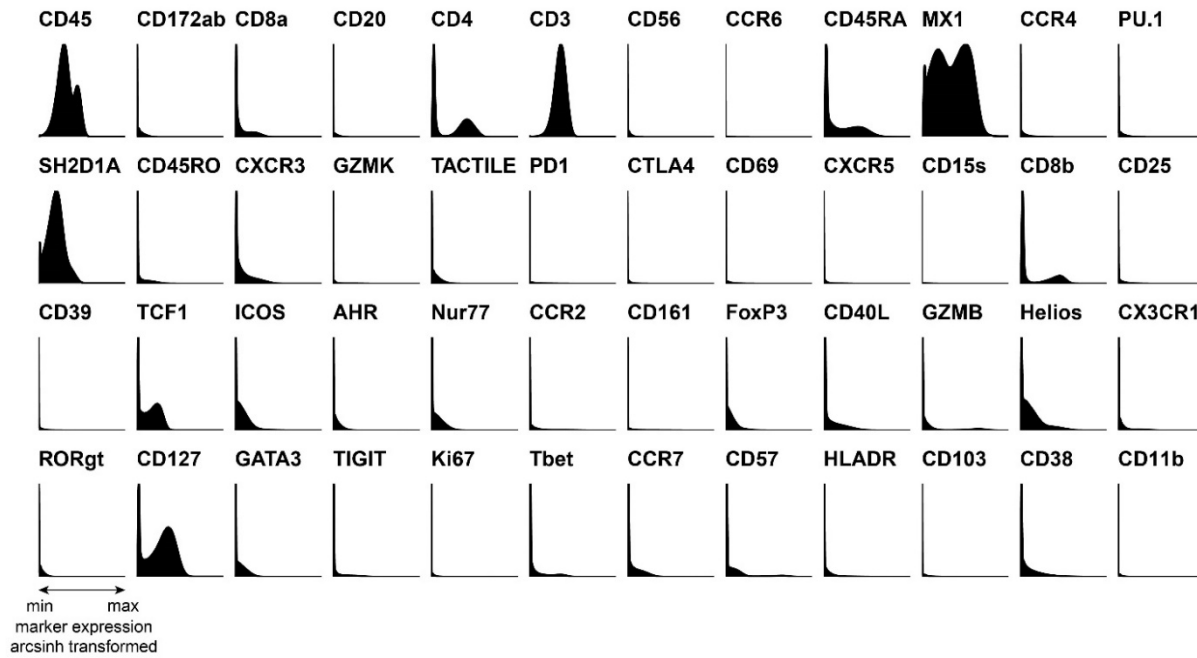

**B**

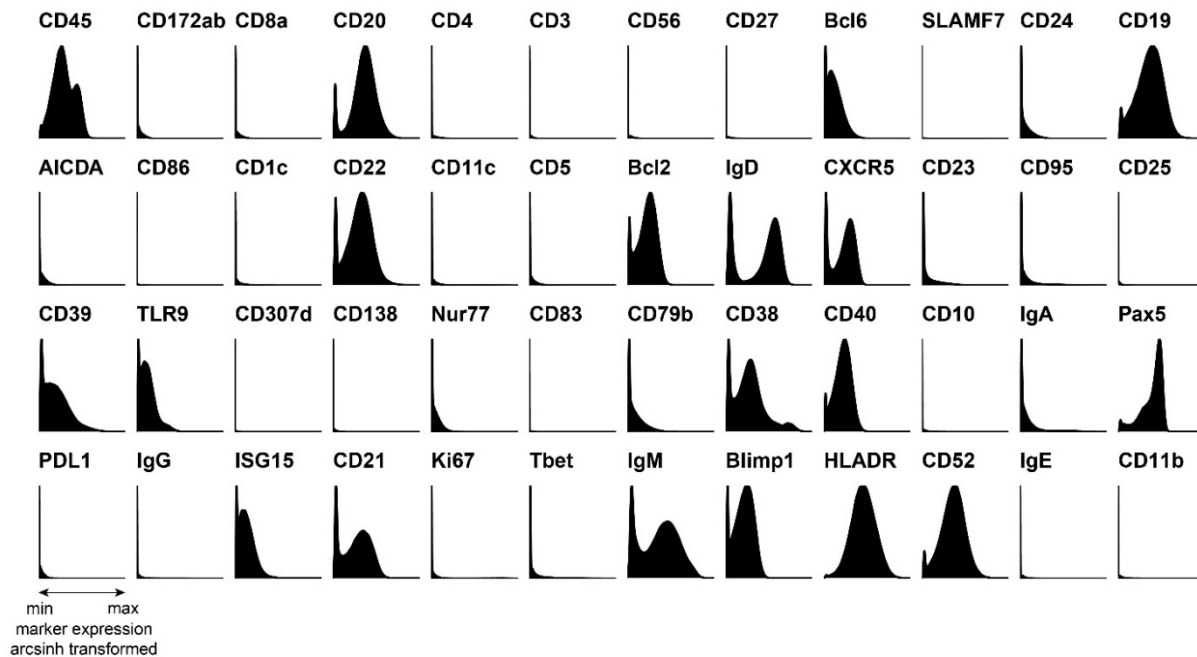

### Supplemental Figure 10. Histograms of T and B-cell mass cytometry makers. (A-B)

Includes all markers from the T-panel expressed by T cells (A) and B-panel expressed by B cells (B).

## Supplemental Figure 11

**A**

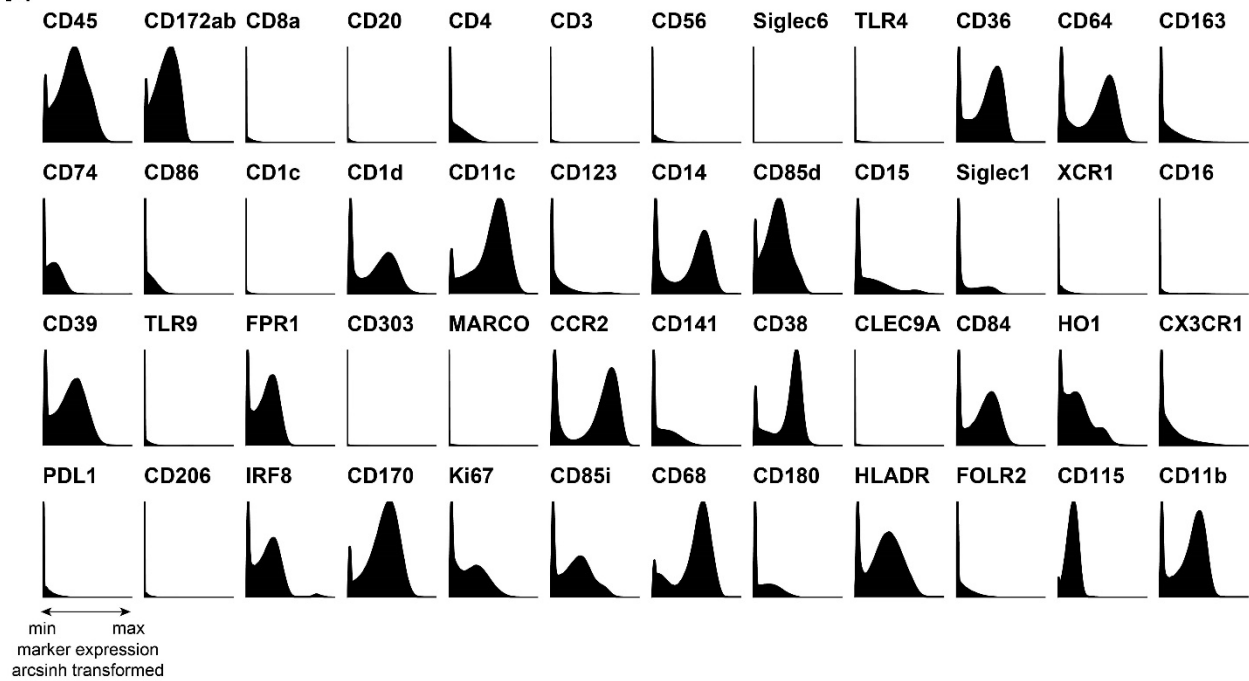

**B**

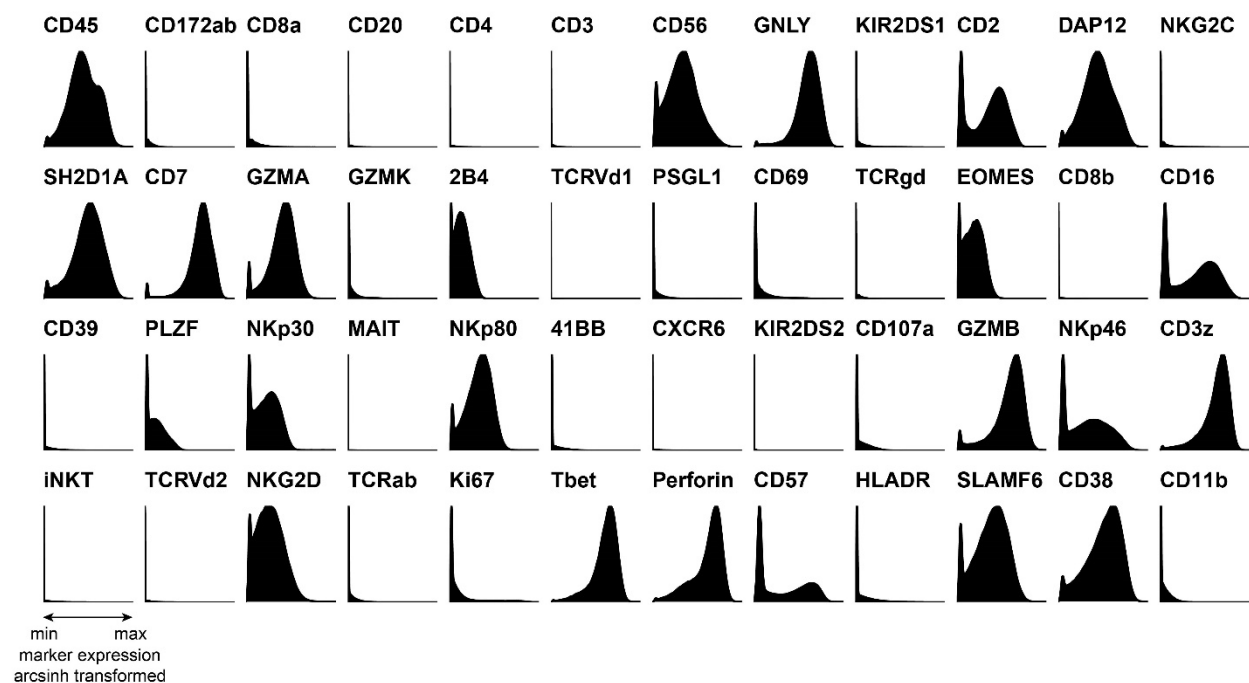

**Supplemental Figure 11. Histograms of myeloid and NK-cell mass cytometry makers. (A-B) Includes all markers from the myeloid-panel expressed by myeloid cells (A) and NK-panel expressed by NK cells (B).**

## Supplemental Figure 12

**A**

Cell clusters association with LN relative to controls

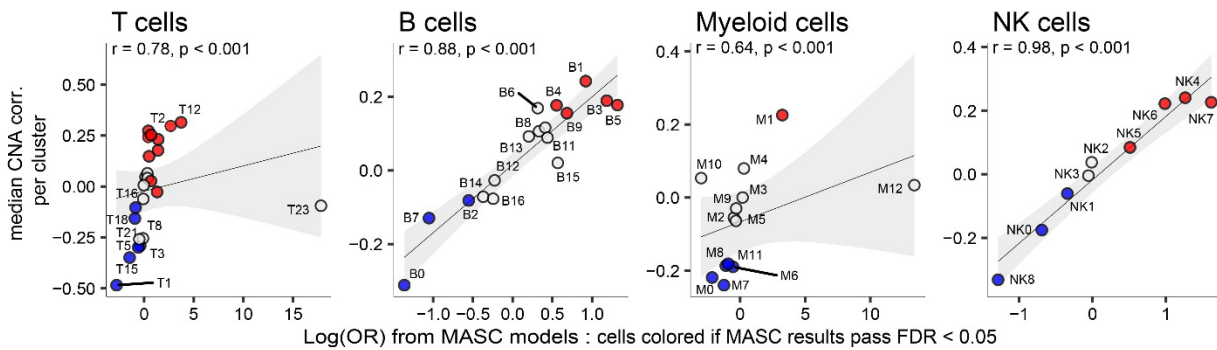

**B**

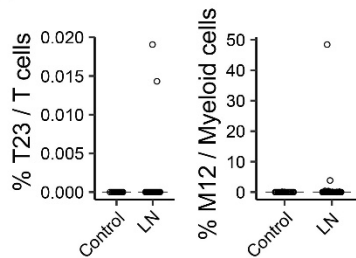

**Supplemental Figure 12. Comparison of CNA and MASC analysis. (A)** Identification of cell clusters associated with LN (max n=140 in the B panel and min 116 in the NK panel) relative to controls (max n=40 in all panels except for n=39 in the NK panel), using two different approaches : covarying neighborhood analysis (CNA) and a single-cell mixed-effect model (MASC). Plots represent the correlation between the two models using Spearman's rho. **(B)** Example of two cellular cluster outliers identified as outliers in figure A.
